# Supplementary material for: Strategic enzymatic enantioselective desymmetrization of prochiral cyclohexa-2,5-dienones
Source: Royal Society of Chemistry journal article supplement (doi:10.1039/d4cc02181a), 2024-01-01

## Supporting Information

### Strategic Enzymatic Enantioselective Desymmetrization of Prochiral Cyclohexa-2,5-dienones

Bhavita Kattula<sup>a,d,#</sup>, Anandarao Munakala<sup>b,#</sup>, Rajnandani Kashyap<sup>a,#</sup>, Tarun Nallamilli<sup>b,d</sup>, Narendra Kumar Nagendra<sup>c,d</sup>, Surabhi Naza<sup>a,d</sup>, Mohana Krishna Reddy Mudiam<sup>c,d</sup>, Rambabu Chegondi<sup>b,d,\*</sup> and Anthony Addlagatta<sup>a,d,\*</sup>

<sup>a</sup>Department of Applied Biology, <sup>b</sup>Department of Organic Synthesis and Process Chemistry, <sup>c</sup>Department of Analytical and Structural Chemistry, CSIR-Indian Institute of Chemical Technology, Hyderabad-500 007, Telangana, India. <sup>d</sup>Academy of Scientific and Innovative Research (AcSIR), Ghaziabad-201002, India. <sup>#</sup>Authors contributed equally to this work.

E-mail: [anthony@csiriict.in](mailto:anthony@csiriict.in); [rchegondi@iict.res.in](mailto:rchegondi@iict.res.in)

## Table of Contents

|                                                                                    |         |
|------------------------------------------------------------------------------------|---------|
| I. General details.....                                                            | S3      |
| II. Detailed experimental procedures.....                                          | S3-S5   |
| III. Analytical data of substrates and products.....                               | S5-S19  |
| IV. Deuterium labeling experiments.....                                            | S20-S22 |
| V. Steady-state kinetic parameters.....                                            | S23-S29 |
| VI. Large – scale bio-reduction of $\alpha$ , $\beta$ -unsaturated substrates..... | S29     |
| VII. NADPH recycling by GDH.....                                                   | S29     |
| VIII. YqjM site directed mutagenesis.....                                          | S30     |
| IX. Chiral HPLC traces of YqjM mutants.....                                        | S31     |
| X. References.....                                                                 | S32     |
| XI. $^1\text{H}$ & $^{13}\text{C}$ NMR Spectra.....                                | S33-S41 |

## I. General details

**General information:** Unless otherwise noted, all reagents were used as received from commercial suppliers. Surespin plasmid mini kit from Genetixbiotech and GeneJET Gel Extraction Kit from Thermo Fisher Scientific were purchased. Oligonucleotides were synthesized and purchased from Sahagene (India). Nickel(II)-nitrilotriacetic acid (Ni-NTA) agarose was purchased from Merck. All reactions were performed under inert atmosphere and in a flame-dried or oven-dried glassware with magnetic stirring. All solvents were dried before use following the standard procedures. Reactions were monitored using thin-layer chromatography (SiO<sub>2</sub>). TLC plates were visualized with UV light (254 nm), iodine treatment or using *p*-anisaldehyde stain or  $\beta$ -naphthol stain. Column chromatography was carried out using silica gel (100-200 mesh) packed in glass columns. NMR spectra were recorded at 400, 500 MHz (H) and at 100, 125 MHz (C), respectively. Chemical shifts ( $\delta$ ) are reported in ppm, using the residual solvent peak in CDCl<sub>3</sub> (H:  $\delta$  = 7.26 and C:  $\delta$  = 77.16 ppm) as internal standard, and coupling constants (*J*) are given in Hz. HRMS were recorded using ESI-TOF techniques.

## II. Detailed experimental procedures

### IIA. Recombinant *B. subtilis* YqjM production

The nucleotide sequence of yqjM gene of *B. subtilis* was obtained from NCBI (NC\_000964.3). The yqjM gene was PCR amplified by using genomic DNA isolated from *Bacillus subtilis* strain 168 (ATCC 23857) as DNA template while incorporating appropriate restriction sites, and cloned into NdeI and HindIII restriction sites of pET-28a (+) vector system using conventional restriction-based cloning. The construct was verified by sequence analysis with a N-terminal 6 $\times$  His-tagged protein, which was transformed into *Escherichia coli* BL21 (DE3) expression system. This allowed over-expression of confirmed clone *B. subtilis* YqjM under the control of isopropyl-1-thio-D-galactopyranoside-inducible (IPTG) T7 promoter.<sup>1</sup>

Gene sequence of *Bacillus subtilis* NADPH dehydrogenase (YqjM), uniprot ID: P54550

```
ATGGCCAGAAAATTATTTACACCTATTACAATTAAGATATGACGTTAAAAAACCGCATTG
TCATGTGCGCAATGTGCATGTATTCTTCTCATGAAAAGGACGGAAAATTAACACCGTTCCA
CATGGCACATTACATATCGCGCGCAATCGGCCAGGTCTGGACTGATTATTGTAGAGGCGTCA
GCGGTAAACCCTCAAGGACGAATCACTGACCAAGACTTAGGCATTTGGAGCGACGAGCATA
```

TTGAAGGCTTTGCAAAACTGACTGAGCAGGTCAAAGAACAAGGTTCAAAAATCGGCATTCA  
GCTTGCCCATGCCGGACGTAAAGCTGAGCTTGAAGGAGATATCTTCGCTCCATCGGGCATT  
GCGTTTGACGAACAATCAGCAACACCTGTAGAAATGTCAGCAGAAAAAGTAAAAGAAACG  
GTCCAGGAGTTCAAGCAAGCGGCTGCCCGCGCAAAAGAAGCCGGCTTTGATGTGATTGAA  
ATTCATGCGGCGCACGGATATTTAATTCATGAATTTTTGTCTCCGCTTTCCAACCATCGAAC  
AGATGAATATGGCGGCTCACCTGAAAACCGCTATCGTTTCTTGAGAGAGATCATTGATGAA  
GTCAAACAAGTATGGGACGGTCCTTTATTTGTCCGTGTATCTGCTTCTGACTACACTGATAA  
AGGCTTAGACATTGCCGATCACATCGGTTTTGCAAAATGGATGAAGGAGCAGGGTGTGAC  
TTAATTGACTGCAGCTCAGGCGCCCTTGTTACGCAGACATTAACGTATTCCCTGGCTATCA  
GGTCAGCTTCGCTGAGAAAATCCGTGAACAGGCGGACATGGCTACTGGTGCCGTCGGCATG  
ATTACAGACGGTTCAATGGCTGAAGAAATTCTGCAAAACGGACGTGCCGACCTCATCTTTA  
TCGGCAGAGAGCTTTTGCGGGATCCATTTTTTGCAGAAGTCTGCTGCGAAACAGCTCAATAC  
AGAGATTCCGGCCCCTGTTCAATACGAAAGAGGCTGGTAA

### **IIB. Expression and purification of *B. subtilis* YqjM (WT)**

Recombinant protein was over-expressed and cultured in 2 L Luria-Bertani (LB) media. 0.5 mM IPTG was added for induction and grown at 37 °C for 4 hours in baffled shake flasks. The cell pellet (10 grams) was preserved at -80 °C until further use.

For Ni-NTA affinity chromatography purification, harvested cells were thawed and re-suspended in the lysis buffer A (50 mM Tris, 200 mM NaCl [pH 7.5] in the presence of 1 mg/mL lysozyme, 1% protease cocktail inhibitor). Bacterial cells were lysed by sonication (pulse of 2 sec ON, 5 sec OFF) and 0.01 mg/mL streptomycin sulphate was added, then centrifuged at 38,724 g for 40 minutes at 4 °C. 2M urea was added to the supernatant before loading on to a 5 mL His Ni-NTA column (Sigma). The column was equilibrated with lysis buffer A prior to loading the supernatant. Washed the column with buffer A to remove impurities and eluted with a step gradient of 2%, 5%, 10%, 20%, 50%, and 100% of buffer B (50 mM Tris, 200 mM NaCl [pH 7.5], 500 mM imidazole, pH 8.0). Extra FMN (5mM concentration, 30mM stock) was added to the pure fraction, as determined by monitoring the absorbance of the column eluent at 280 nm followed by SDS-PAGE analysis and were dialyzed against the buffer C (20 mM Tris [pH 7.5], 100 mM NaCl) to remove imidazole and unbound FMN. Pure concentrated proteins were

analyzed on SDS-PAGE for purity (>95% pure). Eluted fractions were pooled and concentrated up to 2 mg/mL, aliquoted 100  $\mu$ L volumes, flash-frozen in liquid nitrogen and stored at -80  $^{\circ}$ C. Total yield of the protein after affinity-based purification was 92 mg.<sup>1,2</sup>

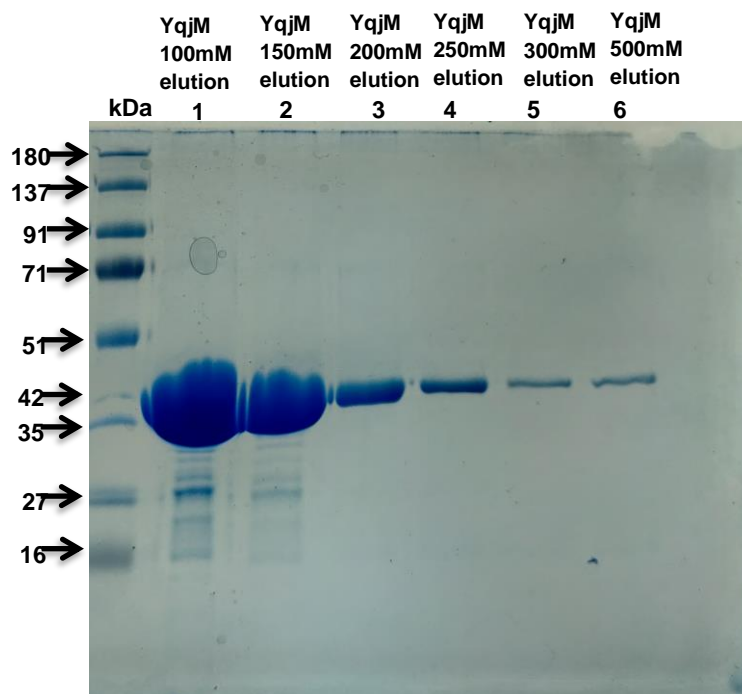

**Fig S1.** SDS-PAGE analysis of pure *Bs* YqjM (WT) after Ni-NTA affinity chromatography.

### III. Analytical data of substrates

#### IIIa. General procedure for the dearomatization of phenols:

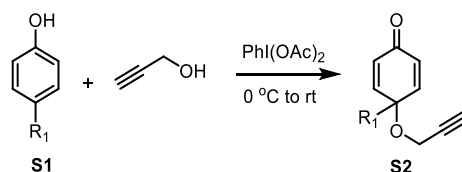

To a solution of the phenol **S1** (1.0 mmol) in 1 mL of propargyl alcohol was added phenyliodine (III) diacetate (1.5 mmol) in many portions at 0  $^{\circ}$ C. The resulting reaction mixture was stirred at room temperature for overnight. Then the reaction mixture was diluted with water (10 mL) and extracted with ethyl acetate (15 mL  $\times$  3). The combined organic solvent was washed with brine (15 mL), dried ( $\text{Na}_2\text{SO}_4$ ), filtered, and concentrated *in vacuo*. The crude reaction mixture was purified by column chromatography (EtOAc/hexane) to give the desired product **S2**.<sup>3-6</sup>

### IIIb. General procedure for the Sonogashira coupling for the synthesis of Cyclohexadienone-tethered alkynes **1**:

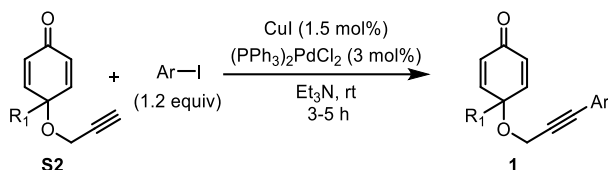

To a solution of *O*-tethered alkyne **S2** (3.0 mmol) in degassed Et<sub>3</sub>N (0.5 M, 6 mL) was added Pd(PPh<sub>3</sub>)<sub>2</sub>Cl<sub>2</sub> (21 mg, 1 mol%), CuI (2.8 mg, 0.5 mol%) and aryl iodide (3.6 mmol). The mixture was stirred at room temperature for 3-5 hours. The reaction was cooled to room temperature, water (15 mL) was added, and the mixture was extracted with EtOAc (3 × 10 mL). The combined organic solvent was washed with 10% aqueous HCl (6 mL), dried (Na<sub>2</sub>SO<sub>4</sub>), filtered, and concentrated *in vacuo*. The mixture was purified by column chromatography (EtOAc/hexane) to give aryl substituted alkynes **1** high yields.<sup>7</sup>

### IIIc. General procedure for the synthesis of 1,3-diyne-tethered cyclohexadienone **1**:

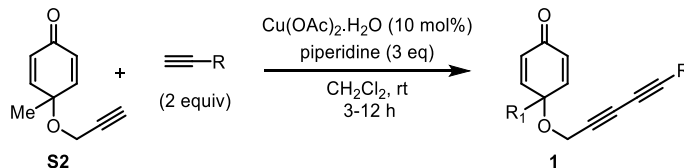

A mixture of alkyne-tethered cyclohexadienone **S2** (3 mmol), terminal alkyne (6 mmol), piperidine (890 μL, 9 mmol), and Cu(OAc)<sub>2</sub>·H<sub>2</sub>O (60 mg, 10 mol%) in CH<sub>2</sub>Cl<sub>2</sub> (0.5 M, 6 mL) was stirred under open atmospheric air at 25°C for 3–12 h. After completion of reaction (monitored by TLC), the mixture was concentrated *in vacuo* and the residue was purified by flash column chromatography on silica gel to afford 1,3-diyne-tethered cyclohexadienone **1**.<sup>8</sup>

### General method for preparation of $\gamma,\gamma$ -disubstituted cyclohexadienone (**1**):<sup>9</sup>

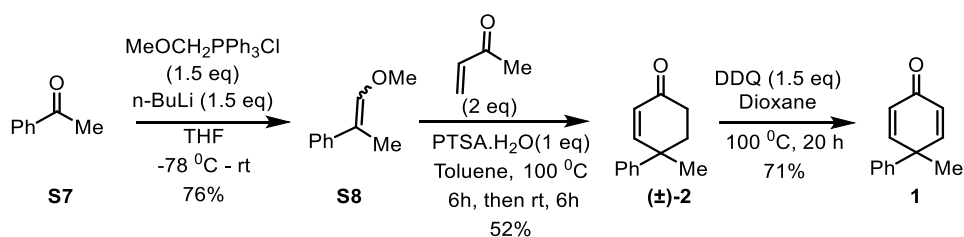

**Step-1:**

A suspension of (methoxymethyl)triphenylphosphonium chloride (5.14 g, 15 mmol) in THF (100 mL) was cooled to  $-78\text{ }^{\circ}\text{C}$  and n-BuLi (1.6 M in hexane, 9.4 mL, 15 mmol) was added dropwise. The resulting red suspension was stirred for 30 min at  $-78\text{ }^{\circ}\text{C}$ , and then for the additional 30 min at room temperature. After re-cooling to  $-78\text{ }^{\circ}\text{C}$ , a solution of ketone **S7** (10 mmol) in THF (20 mL) was added dropwise and the mixture was stirred at this temperature for 30 min and then warmed up to room temperature. After stirring overnight, the reaction mixture was poured into water and the aqueous phase was extracted with Et<sub>2</sub>O. The organic phase was dried over anhydrous MgSO<sub>4</sub> and concentrated under reduced pressure. Purification by column chromatography on silica gel afforded the enol-methyl ether compound **S8** in 76% yield.

**Step-2:**

Methyl vinyl ketone (2 eq.) was added to a stirred mixture of compound **S8** (1 eq.) and p-toluenesulfonic acid monohydrate (1 eq.) in toluene, and the resulting mixture was stirred at  $100\text{ }^{\circ}\text{C}$  for 6 h and then allowed to cool to room temperature overnight. The mixture was poured into saturated NaHCO<sub>3</sub>, extracted with EtOAc. The combined organic phase was dried over anhydrous MgSO<sub>4</sub> and concentrated under reduced pressure. Purification by column chromatography on silica gel afforded  $\gamma,\gamma$ -disubstituted cyclohexenone **2**.

**Step-3:**

The mixture of compound **A** and DDQ (2 eq.) in 1,4-dioxane was heated at  $100\text{ }^{\circ}\text{C}$  for 20 h. The cooled resulting mixture was poured into a 1:1 mixture of ether / hexane and washed with 5% aq NaOH and water. The organic phase dried over anhydrous MgSO<sub>4</sub> and concentrated under reduced pressure. Purification by column chromatography on silica gel afforded  $\gamma,\gamma$ -disubstituted cyclohexadienone **1**.

## Preparation of racemic compounds:

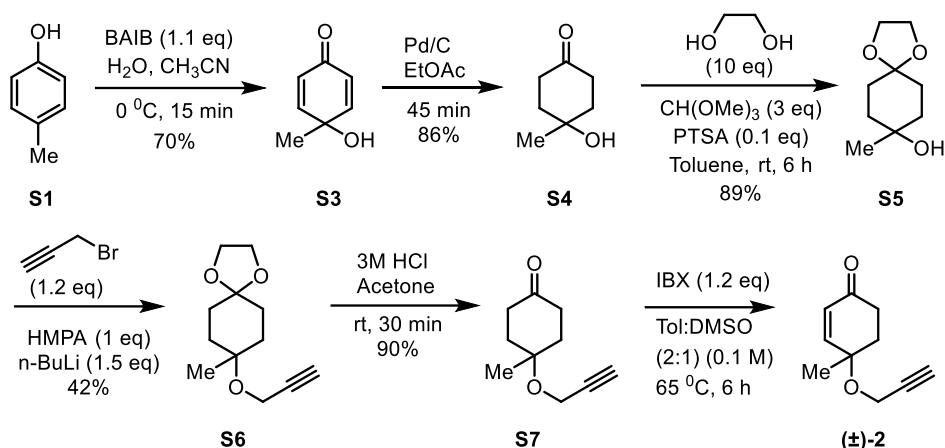

### Step-1:

A round bottom flask was charged with cresol (5 g, 46.3 mmol, 1 equiv), in CH<sub>3</sub>CN (300 mL) and H<sub>2</sub>O (126 mL). The reaction mixture was cooled to 0 °C and treated portion wise with PhI(OAc)<sub>2</sub> (16.4 g, 1.1 equiv). The reaction mixture was stirred at same temperature for another 10 minutes until consumption of starting material **2a** monitored by thin layer chromatography (TLC). Then, diluted with EtOAc (50 mL), washed with 1M NaHCO<sub>3</sub> (25 mL). The combined organic solvent was dried (Na<sub>2</sub>SO<sub>4</sub>), filtered, and concentrated *in vacuo*. Then residue was purified by flash column chromatography on silica gel (40% EtOAc/hexanes; R<sub>f</sub> = 0.4) to afford product **S3** in 70% yield (4 g) yellowish oils.<sup>10</sup>

### Step-2:

A round bottom flask was charged with enone **S3** (3 g, 24.2 mmol, 1 equiv), in EtOAc (30 mL) under inert atmosphere then added 10% Pd-C catalyst (300 mg). The reaction mixture was stirred at room temperature under hydrogen atmosphere for 1 h until consumption of starting material **S3** monitored by thin layer chromatography (TLC). The reaction mixture was filtered through pad of celite, concentrated on reduced pressure, and the residue was directly subjected to flash column chromatography on silica gel (40% EtOAc/hexanes; R<sub>f</sub> = 0.4) to afford the desired product **S4** with 86% yield (2.7 g) as colourless oil.<sup>11</sup>

### Step-3:

A mixture of ketone **S4** (3 g, 23.4 mmol, 1 equiv), trimethyl orthoformate (7.7 mL, 3 equiv), p-TsOH (403 mg, 0.1 equiv) in ethylene glycol (13.5 mL, 10 equiv) was stirred at r.t. under Ar overnight. The mixture was diluted with sat. NaHCO<sub>3</sub> (15 mL), extracted with EtOAc (3X15 mL). The combined



organic layers were washed with brine, dried (Na<sub>2</sub>SO<sub>4</sub>), filtered, and concentrated in vacuo. The residue was purified by chromatography on silica gel (EtOAc/hexanes, 1:9) to afford ketal **S5** in 89% yield (3.5 g) as a colorless oil.

**Step-4:**

1,4-Dioxaspiro[4.5]decan-8-ol **S5** (3.5 g, 20.3 mmol, 1 equiv) and hexamethylphosphoramide (3.5 mL, 1 equiv) were dissolved in anhydrous THF, and the mixture was stirred at 0 °C under argon atmosphere. And then n-BuLi (19 mL, 1.6 M, 1.5 equiv) was added slowly into the reaction mixture over 10 minutes. 3-Bromopropyne (2.3 mL, 1.2 equiv, 80% in toluene) was added after 30 minutes. The reaction was allowed to warm to room temperature and stirred overnight. The reaction was quenched with brine. The phases were separated and the aqueous phase was extracted with EtOAc (3×40 mL). The combined organic layers were dried over Na<sub>2</sub>SO<sub>4</sub>, filtered, evaporated, the residue was purified by column chromatography to afford **S6** as yellow oil (1.9 g, 46% yield).<sup>12</sup>

**Step-5:**

8-Methyl-1,4-dioxaspiro[4.5]decane-8-ol **S6** (1.9 mg, 9 mmol, 1 equiv) was dissolved in THF (20 ml), followed by addition of 3M aqueous HCl solution (5 ml), and then the resulting mixture was stirred at room temperature for 1 hour. The resulting reaction liquid was concentrated under reduced pressure, and then extracted with 10% MeOH/CH<sub>2</sub>Cl<sub>2</sub> (20 ml x 5). The organic layer was dried over anhydrous sodium sulfate, followed by filtration and concentration, and then the residue was subjected to column chromatography to afford **S7** as yellow oil (1.35 g, 90% yield).

Compounds **1g-1i** was prepared according to a previously reported procedure.<sup>13</sup>

**(S)-1-methyl-2,3-dihydro-[1,1'-biphenyl]-4(1H)-one (2a):**

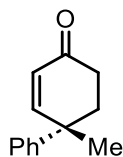

Prepared according to the general procedure as described above in 92% yield. It was purified by flash chromatography (10% EtOAc/hexanes;  $R_f = 0.4$ ) to afford a yellow oil;  $^1\text{H}$  NMR (400 MHz,  $\text{CDCl}_3$ )  $\delta$  7.33 – 7.26 (m, 4H), 7.24 – 7.16 (m, 1H), 6.87 (dd,  $J = 10.2, 0.9$  Hz, 1H), 6.06 (d,  $J = 10.1$  Hz, 1H), 2.40 – 2.30 (m, 1H), 2.28 – 2.16 (m, 2H), 2.12 – 2.03 (m, 1H), 1.50 (s, 3H);  $^{13}\text{C}$  NMR (101 MHz,  $\text{CDCl}_3$ )  $\delta$  199.6, 157.2, 145.4, 128.7, 128.7, 126.9, 126.3, 40.7, 38.2, 34.7, 27.7; HRMS (ESI)  $m/z$ :  $[\text{M}+\text{H}]^+$  Calcd for  $\text{C}_{13}\text{H}_{15}\text{O}$  187.1123; Found 187.1118;  $[\alpha]_D^{20} = -70.74^\circ$  ( $c$  0.45, EtOH); >99.7% *ee*; Chiral HPLC analysis of the product: Daicel Chiralpak AD-H 250X4.6 mm 5 $\mu$ column; hexane/2-propanol = 97:03, detected at 254 nm, Flow rate = 1 mL/min, Retention times: 7.78 min (major), 8.92 min (minor).

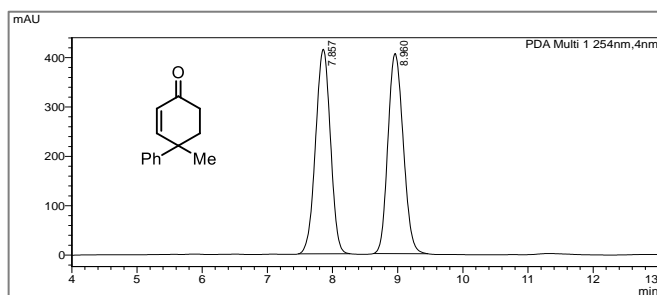

| <Peak Table>  |           |          |        |         |         |
|---------------|-----------|----------|--------|---------|---------|
| PDA Ch1 254nm |           |          |        |         |         |
| Peak#         | Ret. Time | Area     | Height | Area%   | Height% |
| 1             | 7.857     | 6560502  | 414374 | 49.784  | 50.548  |
| 2             | 8.960     | 6617392  | 405384 | 50.216  | 49.452  |
| Total         |           | 13177893 | 819758 | 100.000 | 100.000 |

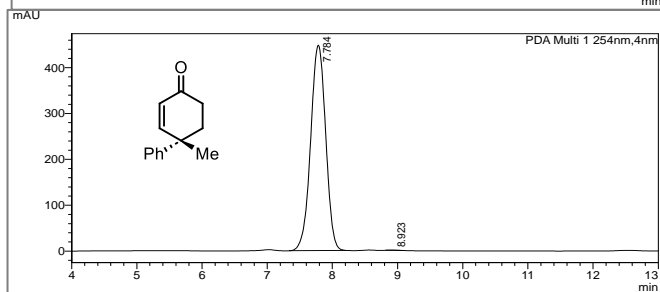

| <Peak Table>  |           |         |        |         |         |
|---------------|-----------|---------|--------|---------|---------|
| PDA Ch1 254nm |           |         |        |         |         |
| Peak#         | Ret. Time | Area    | Height | Area%   | Height% |
| 1             | 7.784     | 7183046 | 447660 | 99.914  | 99.867  |
| 2             | 8.923     | 6190    | 598    | 0.086   | 0.133   |
| Total         |           | 7189236 | 448258 | 100.000 | 100.000 |

## 4-Hydroxy-4-methylcyclohex-2-en-1-one (2b):

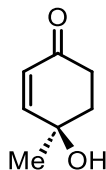

Prepared according to the general procedure as described above in 84% yield. It was purified by flash chromatography (30% EtOAc in hexanes;  $R_f = 0.5$ ) to afford a dark yellow oil;  $^1\text{H}$  NMR (400 MHz,  $\text{CDCl}_3$ )  $\delta$  6.75 (d,  $J = 10.1$  Hz, 1H), 5.84 (d,  $J = 10.2$  Hz, 1H), 2.79 (s, 1H), 2.59 (ddd,  $J = 17.2, 6.3, 5.3$  Hz, 1H), 2.39 (ddd,  $J = 17.2, 9.3, 5.7$  Hz, 1H), 2.15 – 2.04 (m, 2H), 1.43 (s, 3H);  $^{13}\text{C}$  NMR (126 MHz,  $\text{CDCl}_3$ )  $\delta$  199.5, 155.2, 127.9, 68.5, 37.3, 34.9, 27.2; HRMS (ESI)  $m/z$ :  $[\text{M}+\text{H}]^+$  Calcd for  $\text{C}_7\text{H}_{11}\text{O}_2$  127.0759; Found 127.0750;  $[\alpha]_D^{20} = -3.33^\circ$  ( $c$  0.1,  $\text{CHCl}_3$ ); 40% *ee*; Chiral HPLC analysis of the product: Daicel Chiralpak IC 250X4.6 mm  $5\mu$  column; hexane/2-propanol = 96:04, detected at 230 nm, Flow rate = 1 mL/min, Retention times: 41.35 min (major), 46.25 min (minor).

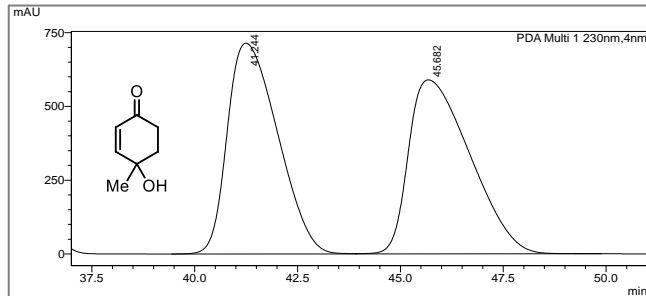

<Peak Table>

| Peak# | Ret. Time | Area      | Height  | Area%   | Height% |
|-------|-----------|-----------|---------|---------|---------|
| 1     | 41.244    | 60768395  | 714254  | 49.795  | 54.777  |
| 2     | 45.682    | 61269111  | 589680  | 50.205  | 45.223  |
| Total |           | 122037506 | 1303934 | 100.000 | 100.000 |

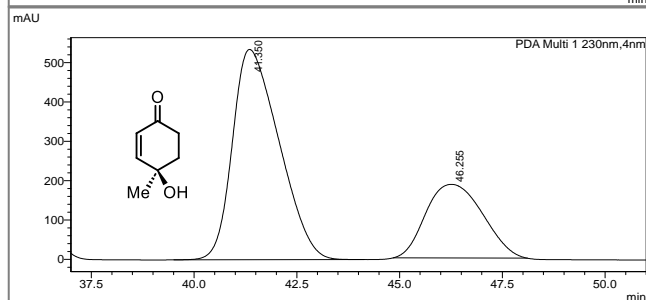

<Peak Table>

| Peak# | Ret. Time | Area     | Height | Area%   | Height% |
|-------|-----------|----------|--------|---------|---------|
| 1     | 41.350    | 42076112 | 534383 | 70.011  | 74.056  |
| 2     | 46.255    | 18022887 | 187211 | 29.989  | 25.944  |
| Total |           | 60098999 | 721594 | 100.000 | 100.000 |

## 1-Methyl-4-oxocyclohex-2-en-1-yl acetate (2d):

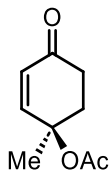

Prepared according to the general procedure as described above in 77% yield. It was purified by flash chromatography (20% EtOAc in hexanes;  $R_f = 0.4$ ) to afford a dark yellow oil;  $^1\text{H}$  NMR (400 MHz,  $\text{CDCl}_3$ )  $\delta$  7.16 (d,  $J = 10.2$  Hz, 1H), 5.92 (d,  $J = 10.2$  Hz, 1H), 2.71 – 2.63 (m, 1H), 2.53 – 2.39 (m, 2H), 2.18 – 2.09 (m, 1H), 2.04 – 2.02 (m, 3H), 1.65 (s, 3H);  $^{13}\text{C}$  NMR (101 MHz,  $\text{CDCl}_3$ )  $\delta$  198.4, 170.3, 151.1, 128.6, 77.4, 35.1, 34.2, 24.7, 21.9;  $[\alpha]_D^{20} = -2.67^\circ$  ( $c$  0.15,  $\text{CHCl}_3$ ); ~98% *ee*; Chiral HPLC analysis of the product: Daicel Chiralpak IC 250X4.6 mm  $5\mu$ column; hexane/2-propanol = 90:10, detected at 230 nm, Flow rate = 1 mL/min, Retention times: 22.14 min (minor), 23.77 min (major).

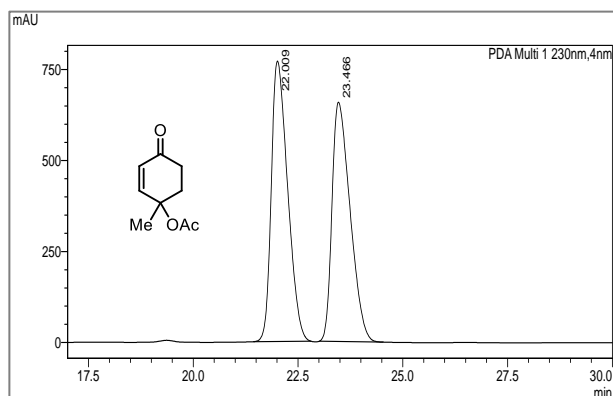

| <Peak Table>  |           |          |         |         |         |
|---------------|-----------|----------|---------|---------|---------|
| PDA Ch1 230nm |           |          |         |         |         |
| Peak#         | Ret. Time | Area     | Height  | Area%   | Height% |
| 1             | 22.009    | 20903015 | 770404  | 51.433  | 53.952  |
| 2             | 23.466    | 19737957 | 657538  | 48.567  | 46.048  |
| Total         |           | 40640972 | 1427941 | 100.000 | 100.000 |

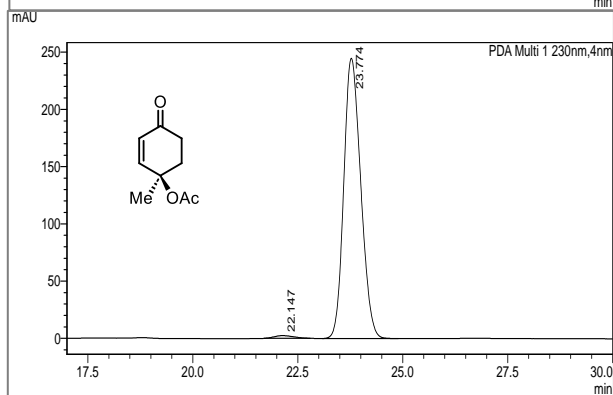

| <Peak Table>  |           |         |        |         |         |
|---------------|-----------|---------|--------|---------|---------|
| PDA Ch1 230nm |           |         |        |         |         |
| Peak#         | Ret. Time | Area    | Height | Area%   | Height% |
| 1             | 22.147    | 73962   | 2345   | 1.063   | 0.949   |
| 2             | 23.774    | 6883194 | 244739 | 98.937  | 99.051  |
| Total         |           | 6957156 | 247083 | 100.000 | 100.000 |

#### 4-Methyl-4-(prop-2-yn-1-yloxy)cyclohex-2-en-1-one (2e):

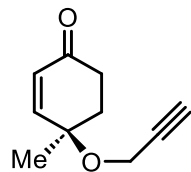

Prepared according to the general procedure as described above in 89% yield. It was purified by flash chromatography (15% EtOAc/hexanes;  $R_f = 0.4$ ) to afford a yellow oil;  $^1\text{H NMR}$  (500 MHz,  $\text{CDCl}_3$ )  $\delta$  6.81 (dd,  $J = 10.3, 1.2$  Hz, 1H), 5.98 (d,  $J = 10.2$  Hz, 1H), 4.16 (d,  $J = 2.4$  Hz, 2H), 2.65 (ddd,  $J = 9.7, 6.4, 4.1$  Hz, 1H), 2.43 (t,  $J = 2.4$  Hz, 1H), 2.45 – 2.32 (m, 2H), 2.02 – 1.96 (m, 1H), 1.46 (s, 3H);  $^{13}\text{C NMR}$  (126 MHz,  $\text{CDCl}_3$ )  $\delta$  198.6, 152.8, 130.2, 80.8, 74.4, 74.3, 51.6, 34.9, 33.5, 24.4; HRMS (ESI)  $m/z$ :  $[\text{M}+\text{H}]^+$  Calcd for  $\text{C}_{10}\text{H}_{13}\text{O}_2$  165.0916; Found 165.0874;  $[\alpha]_D^{20} = -47.00^\circ$  ( $c$  0.6,  $\text{CHCl}_3$ ); ~100% *ee*; Chiral HPLC analysis of the product: Daicel Chiralpak IC 250X4.6 mm  $5\mu\text{m}$  column; hexane/2-propanol = 95:05, detected at 245 nm, Flow rate = 1 mL/min, Retention times: 19.51 min (major).

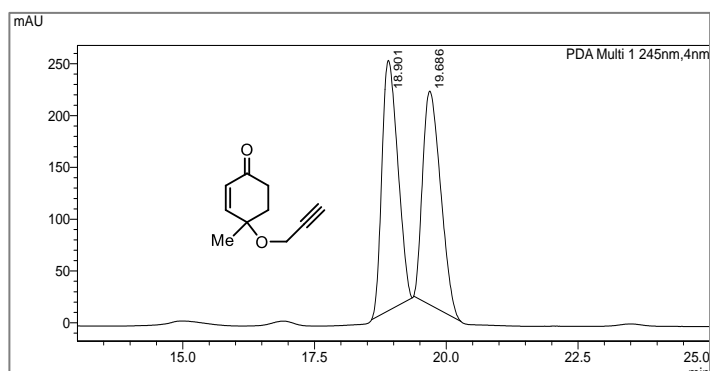

<Peak Table>

| PDA Ch1 245nm |           |         |        |         |         |
|---------------|-----------|---------|--------|---------|---------|
| Peak#         | Ret. Time | Area    | Height | Area%   | Height% |
| 1             | 18.901    | 5071424 | 241588 | 50.767  | 53.960  |
| 2             | 19.686    | 4918135 | 206126 | 49.233  | 46.040  |
| Total         |           | 9989559 | 447715 | 100.000 | 100.000 |

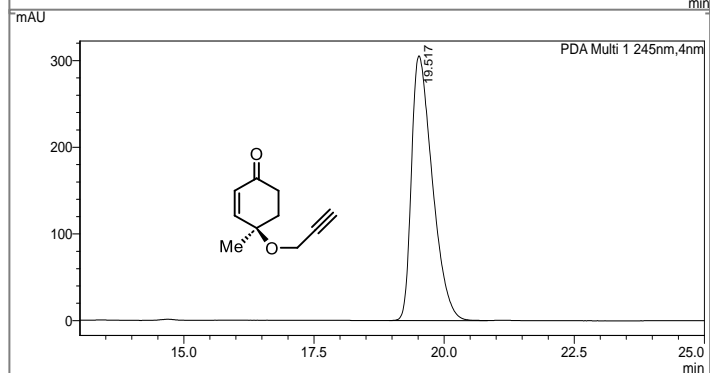

<Peak Table>

| PDA Ch1 245nm |           |         |        |         |         |
|---------------|-----------|---------|--------|---------|---------|
| Peak#         | Ret. Time | Area    | Height | Area%   | Height% |
| 1             | 19.517    | 8515178 | 305312 | 100.000 | 100.000 |
| Total         |           | 8515178 | 305312 | 100.000 | 100.000 |

#### 4-(Benzyloxy)-4-methylcyclohex-2-en-1-one (2f):

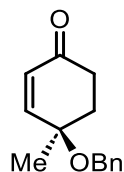

Prepared according to the general procedure as described above in 74% yield. It was purified by flash chromatography (10% EtOAc/hexanes;  $R_f = 0.4$ ) to afford a yellow oil;  $^1\text{H}$  NMR (400 MHz,  $\text{CDCl}_3$ )  $\delta$  7.37 – 7.27 (m, 5H), 6.88 (dd,  $J = 10.3, 1.2$  Hz, 1H), 6.00 (d,  $J = 10.3$  Hz, 1H), 4.58 – 4.49 (m, 2H), 2.75 – 2.62 (m, 1H), 2.51 – 2.37 (m, 2H), 2.10 – 2.00 (m, 1H), 1.52 (s, 3H);  $^{13}\text{C}$  NMR (101 MHz,  $\text{CDCl}_3$ )  $\delta$  199.0, 154.0, 138.8, 129.9, 128.6, 127.7, 127.5, 73.5, 65.4, 35.0, 33.7, 24.5; HRMS (ESI)  $m/z$ :  $[\text{M}+\text{H}]^+$  Calcd for  $\text{C}_{14}\text{H}_{17}\text{O}_2$  217.1229; Found 217.1212;  $[\alpha]_D^{20} = -72.49^\circ$  ( $c$  0.2,  $\text{CHCl}_3$ ); >99.5% *ee*; Chiral HPLC analysis of the product: Daicel Chiralpak IC 250X4.6 mm 5 $\mu$ column; hexane/2-propanol = 95:05, detected at 254 nm, Flow rate = 1 mL/min, Retention times: 15.03 min (minor), 16.44 min (major).

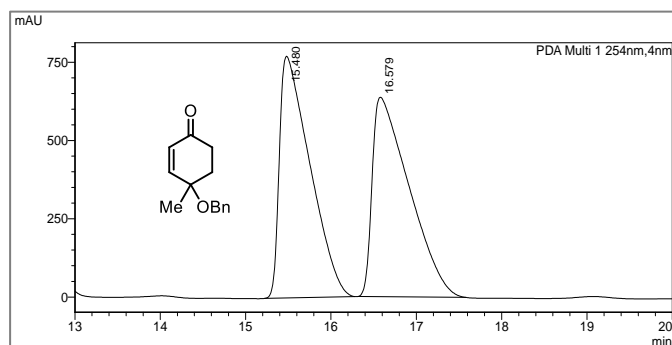

| <Peak Table>  |           |          |         |         |         |
|---------------|-----------|----------|---------|---------|---------|
| PDA Ch1 254nm |           |          |         |         |         |
| Peak#         | Ret. Time | Area     | Height  | Area%   | Height% |
| 1             | 15.480    | 19164131 | 772073  | 49.998  | 54.805  |
| 2             | 16.579    | 19165327 | 636700  | 50.002  | 45.195  |
| Total         |           | 38329458 | 1408773 | 100.000 | 100.000 |

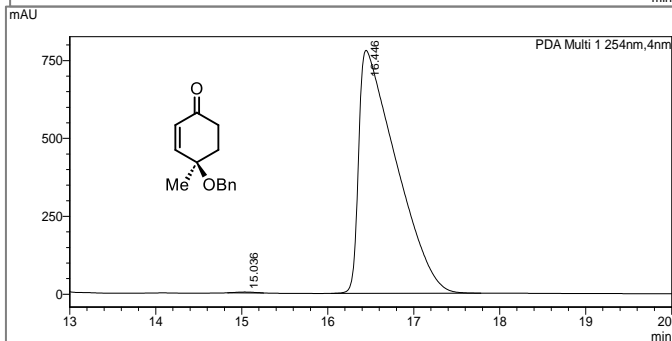

| <Peak Table>  |           |          |        |         |         |
|---------------|-----------|----------|--------|---------|---------|
| PDA Ch1 254nm |           |          |        |         |         |
| Peak#         | Ret. Time | Area     | Height | Area%   | Height% |
| 1             | 15.036    | 39010    | 2705   | 0.165   | 0.345   |
| 2             | 16.446    | 23537356 | 780167 | 99.835  | 99.655  |
| Total         |           | 23576366 | 782871 | 100.000 | 100.000 |

**N-(1-Methyl-4-oxocyclohex-2-en-1-yl) acetamide (2g):**

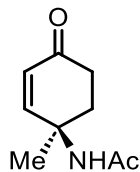

Prepared according to the general procedure as described above in 70% yield. It was purified by flash chromatography (100% EtOAc;  $R_f = 0.4$ ) to afford a dark yellow oil;  $^1\text{H NMR}$  (400 MHz,  $\text{CDCl}_3$ )  $\delta$  7.05 (dd,  $J = 10.2, 1.2$  Hz, 1H), 5.92 (d,  $J = 10.2$  Hz, 1H), 5.57 (s, 1H), 2.73 – 2.40 (m, 4H), 1.98 (s, 3H), 1.53 (s, 3H);  $^{13}\text{C NMR}$  (101 MHz,  $\text{CDCl}_3$ )  $\delta$  198.1, 169.8, 154.7, 127.7, 52.6, 34.5, 34.4, 25.1, 24.1; HRMS (ESI)  $m/z$ :  $[\text{M}+\text{H}]^+$  Calcd for  $\text{C}_9\text{H}_{13}\text{NO}_2\text{Na}$  190.0844; Found 190.0839;  $[\alpha]_D^{20} = -1^\circ$  ( $c$  0.1,  $\text{CHCl}_3$ ); >99.8% *ee*; Chiral HPLC analysis of the product: Daicel Chiralpak IC 250X4.6 mm  $5\mu\text{m}$  column; hexane/2-propanol = 60:40, detected at 254 nm, Flow rate = 1 mL/min, Retention times: 10.59 min (minor), 13.80 min (major).

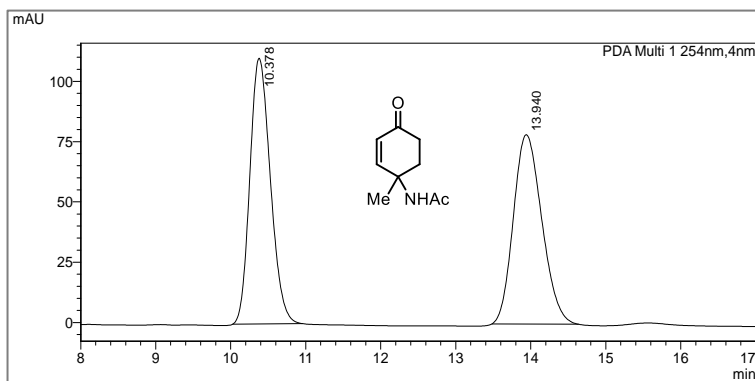

**<Peak Table>**

| PDA Ch1 254nm |           |         |        |         |         |
|---------------|-----------|---------|--------|---------|---------|
| Peak#         | Ret. Time | Area    | Height | Area%   | Height% |
| 1             | 10.378    | 2092988 | 110198 | 50.286  | 58.395  |
| 2             | 13.940    | 2069209 | 78515  | 49.714  | 41.605  |
| Total         |           | 4162198 | 188713 | 100.000 | 100.000 |

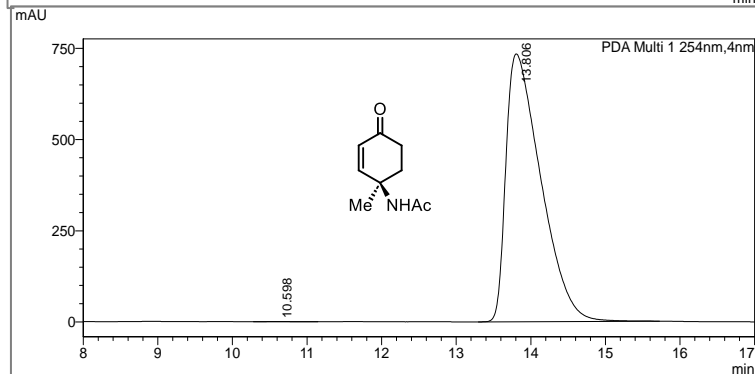

**<Peak Table>**

| PDA Ch1 254nm |           |          |        |         |         |
|---------------|-----------|----------|--------|---------|---------|
| Peak#         | Ret. Time | Area     | Height | Area%   | Height% |
| 1             | 10.598    | 13500    | 680    | 0.057   | 0.092   |
| 2             | 13.806    | 23849020 | 734290 | 99.943  | 99.908  |
| Total         |           | 23862519 | 734970 | 100.000 | 100.000 |

## N-(1-Ethyl-4-oxocyclohex-2-en-1-yl)acetamide (2h):

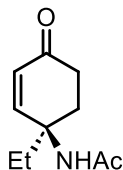

Prepared according to the general procedure as described above in 88% yield. It was purified by flash chromatography (100% EtOAc;  $R_f = 0.4$ ) to afford a dark yellow oil;  $^1\text{H NMR}$  (400 MHz,  $\text{CDCl}_3$ )  $\delta$  7.13 (d,  $J = 10.3$  Hz, 1H), 5.94 (d,  $J = 10.3$  Hz, 1H), 5.56 (s, 1H), 2.58 – 2.39 (m, 3H), 2.11 – 2.03 (m, 2H), 1.98 (s, 3H), 1.78 (td,  $J = 14.8, 7.4$  Hz, 1H), 0.95 (t,  $J = 7.5$  Hz, 3H);  $^{13}\text{C NMR}$  (101 MHz,  $\text{CDCl}_3$ )  $\delta$  198.4, 170.0, 154.0, 128.1, 55.2, 34.0, 31.7, 29.9, 24.0, 8.2; HRMS (ESI)  $m/z$ :  $[\text{M}+\text{H}]^+$  Calcd for  $\text{C}_{10}\text{H}_{15}\text{NO}_2\text{Na}$  204.1000; Found 204.0999;  $[\alpha]^{20}_D = -30.75^\circ$  ( $c$  0.8,  $\text{CHCl}_3$ ); >99.5% *ee*; Chiral HPLC analysis of the product: Daicel Chiralpak IC 250X4.6 mm  $5\mu$  column; hexane/2-propanol = 65:35, detected at 254 nm, Flow rate = 1 mL/min, Retention times: 11.29 min (minor), 13.04 min (major).

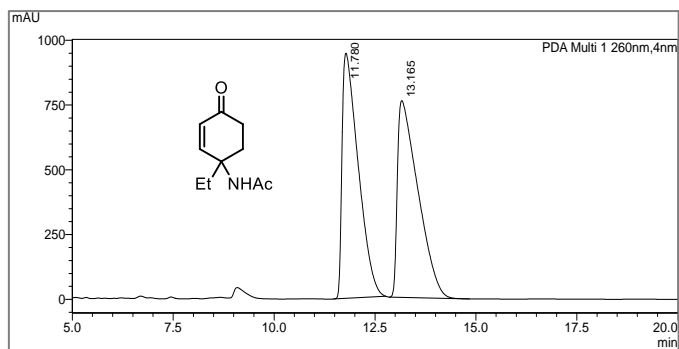

| <Peak Table>  |           |          |         |         |         |
|---------------|-----------|----------|---------|---------|---------|
| PDA Ch1 260nm |           |          |         |         |         |
| Peak#         | Ret. Time | Area     | Height  | Area%   | Height% |
| 1             | 11.780    | 26404125 | 946856  | 49.521  | 55.485  |
| 2             | 13.165    | 26915213 | 759637  | 50.479  | 44.515  |
| Total         |           | 53319338 | 1706493 | 100.000 | 100.000 |

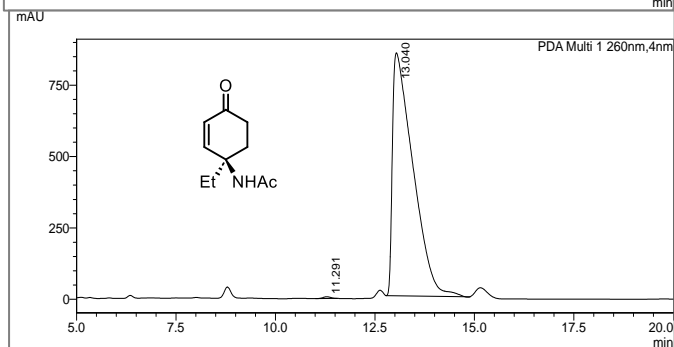

| <Peak Table>  |           |          |        |         |         |
|---------------|-----------|----------|--------|---------|---------|
| PDA Ch1 260nm |           |          |        |         |         |
| Peak#         | Ret. Time | Area     | Height | Area%   | Height% |
| 1             | 11.291    | 82668    | 6327   | 0.270   | 0.738   |
| 2             | 13.040    | 30567043 | 850670 | 99.730  | 99.262  |
| Total         |           | 30649711 | 856997 | 100.000 | 100.000 |



#### 4-Methyl-4-((3-phenylprop-2-yn-1-yl)oxy)cyclohex-2-en-1-one (2j):

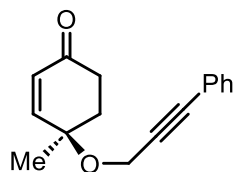

Prepared according to the general procedure as described above in 87% yield. It was purified by flash chromatography (15% EtOAc/hexanes;  $R_f = 0.4$ ) to afford a yellow oil;  $^1\text{H}$  NMR (400 MHz,  $\text{CDCl}_3$ )  $\delta$  7.45 – 7.40 (m, 2H), 7.34 – 7.27 (m, 3H), 6.89 (dd,  $J = 10.3, 1.2$  Hz, 1H), 6.01 (d,  $J = 10.3$  Hz, 1H), 4.40 (s, 2H), 2.74 – 2.64 (m, 1H), 2.50 – 2.39 (m, 2H), 2.06 – 2.00 (m, 1H), 1.51 (s, 3H);  $^{13}\text{C}$  NMR (101 MHz,  $\text{CDCl}_3$ )  $\delta$  198.8, 153.2, 131.8, 130.1, 128.7, 128.4, 122.6, 86.1, 86.0, 74.3, 52.4, 35.0, 33.5, 24.5; HRMS (ESI)  $m/z$ :  $[\text{M}+\text{H}]^+$  Calcd for  $\text{C}_{16}\text{H}_{17}\text{O}_2$  241.1229; Found 241.1220;  $[\alpha]_D^{20} = -96.57^\circ$  ( $c$  1.2,  $\text{CHCl}_3$ ); 90% *ee*; Chiral HPLC analysis of the product: Daicel Chiralpak IC 250X4.6 mm  $5\mu$ column; hexane/2-propanol = 95:05, detected at 254 nm, Flow rate = 1 mL/min, Retention times: 16.29 min (minor), 22.49 min (major).

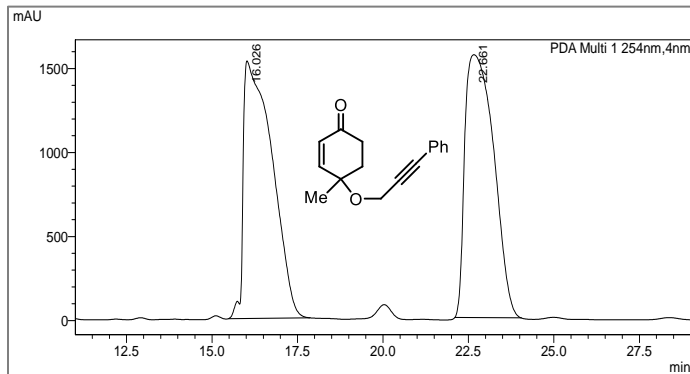

| <Peak Table>  |           |           |         |         |         |
|---------------|-----------|-----------|---------|---------|---------|
| PDA Ch1 254nm |           |           |         |         |         |
| Peak#         | Ret. Time | Area      | Height  | Area%   | Height% |
| 1             | 16.026    | 89506064  | 1533538 | 49.335  | 49.479  |
| 2             | 22.661    | 91919664  | 1565834 | 50.665  | 50.521  |
| Total         |           | 181425729 | 3099372 | 100.000 | 100.000 |

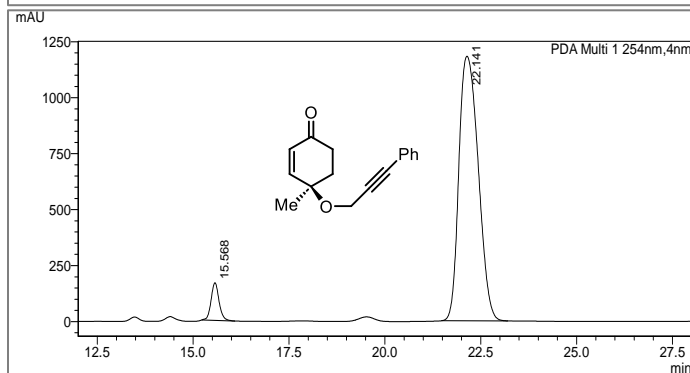

| <Peak Table>  |           |          |         |         |         |
|---------------|-----------|----------|---------|---------|---------|
| PDA Ch1 254nm |           |          |         |         |         |
| Peak#         | Ret. Time | Area     | Height  | Area%   | Height% |
| 1             | 15.568    | 2409542  | 167260  | 5.489   | 12.402  |
| 2             | 22.141    | 41484152 | 1181413 | 94.511  | 87.598  |
| Total         |           | 43893694 | 1348673 | 100.000 | 100.000 |

**4-((5-(4-(Tert-butyl)phenyl)penta-2,4-diyne-1-yl)oxy)-4-methylcyclohex-2-en-1-one (2n):**

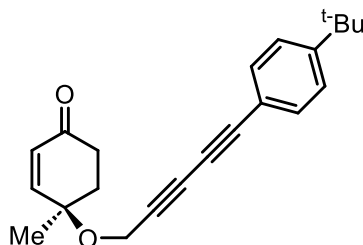

Prepared according to the general procedure as described above in 94% yield.  $^1\text{H}$  NMR (500 MHz,  $\text{CDCl}_3$ )  $\delta$  7.45 – 7.41 (m, 2H), 7.36 – 7.32 (m, 2H), 6.83 (dd,  $J = 10.3, 1.2$  Hz, 1H), 6.01 (d,  $J = 10.3$  Hz, 1H), 4.31 (s, 2H), 2.68 (ddd,  $J = 9.8, 6.4, 3.9$  Hz, 1H), 2.48 – 2.36 (m, 2H), 2.04 – 2.00 (m, 1H), 1.48 (s, 3H), 1.30 (s, 9H);  $^{13}\text{C}$  NMR (126 MHz,  $\text{CDCl}_3$ )  $\delta$  198.6, 153.0, 152.7, 132.5, 130.3, 125.6, 118.4, 79.1, 78.9, 74.6, 72.8, 71.0, 52.4, 35.1, 34.9, 33.6, 31.2, 24.4; HRMS (ESI)  $m/z$ :  $[\text{M}+\text{H}]^+$  Calcd for  $\text{C}_{22}\text{H}_{25}\text{O}_2$  321.1855; Found 321.1855;  $[\alpha]_D^{20} = -19.20^\circ$  ( $c$  0.5,  $\text{CHCl}_3$ ); ~99% *ee*; Chiral HPLC analysis of the product: Daicel Chiralpak IC 250X4.6 mm  $5\mu\text{m}$  column; hexane/2-propanol = 93:07, detected at 230 nm, Flow rate = 1 mL/min, Retention times: 22.04 min (minor), 26.84 min (major).

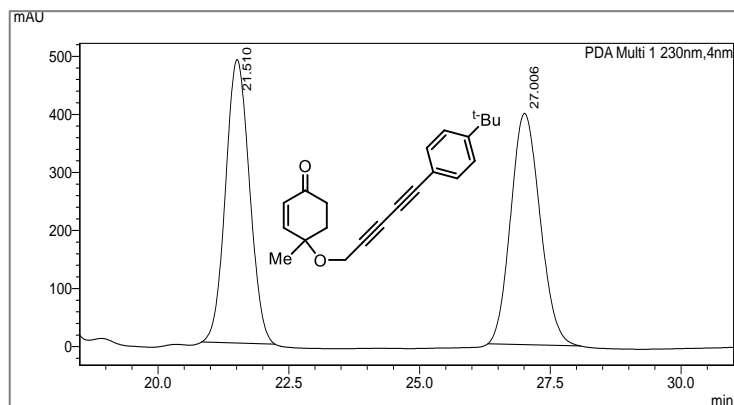

| <Peak Table>  |           |          |        |         |         |
|---------------|-----------|----------|--------|---------|---------|
| PDA Ch1 230nm |           |          |        |         |         |
| Peak#         | Ret. Time | Area     | Height | Area%   | Height% |
| 1             | 21.510    | 15544099 | 488309 | 49.942  | 55.063  |
| 2             | 27.006    | 15580215 | 398513 | 50.058  | 44.937  |
| Total         |           | 31124315 | 886821 | 100.000 | 100.000 |

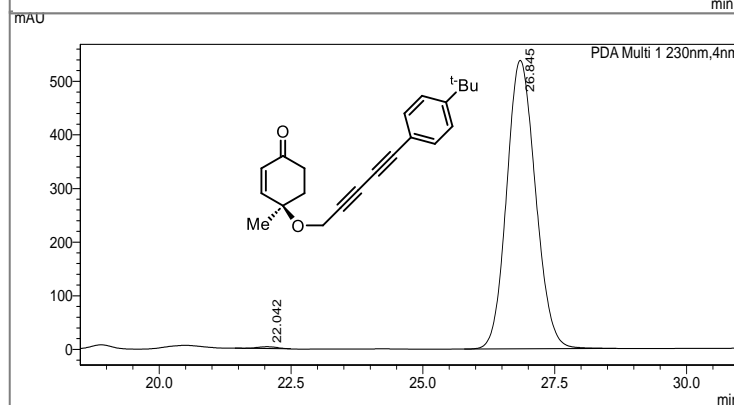

| <Peak Table>  |           |          |        |         |         |
|---------------|-----------|----------|--------|---------|---------|
| PDA Ch1 230nm |           |          |        |         |         |
| Peak#         | Ret. Time | Area     | Height | Area%   | Height% |
| 1             | 22.042    | 88462    | 3418   | 0.430   | 0.631   |
| 2             | 26.845    | 20477672 | 537946 | 99.570  | 99.369  |
| Total         |           | 20566134 | 541364 | 100.000 | 100.000 |

**3',4'-Dihydro-2'H-spiro[cyclohexane-1,1'-naphthalen]-2-en-4-one (2o):**

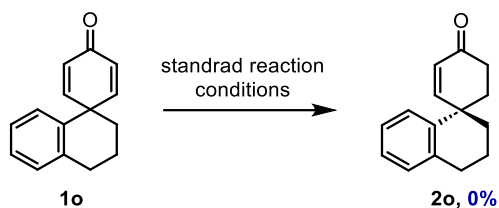

We carried out experiment on compound **1o** in the presence YqjM (WT) enzyme. The assay reaction was performed by dissolving the substrate in ethanol (1 mM) and added to a Tris buffer solution (0.1 M, pH 7.5). To this, we have added glucose (20 mM), NADPH (1.2 mM), glucose oxidase (10 U $\text{mg}^{-1}\text{mL}^{-1}$ ). The reaction was initiated after addition of purified enzymes at 200 nM. The reaction mix was incubated for 12 h in an orbital shaker (100 rpm, 25°C). However, The reaction did not proceed and most of the starting material was recovered.

## IV. Deuterium Labeling Experiments.

### IVa. Intermolecular competition experiment between compound **1j** and **1j-d<sub>4</sub>**:

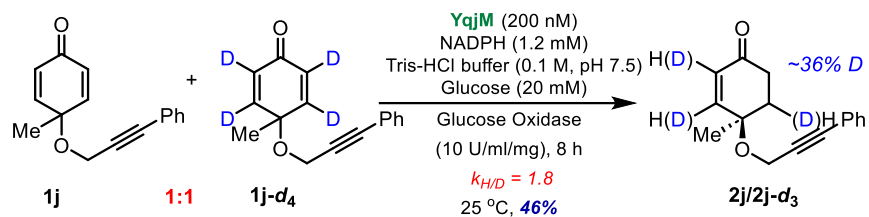

We conducted intermolecular competition experiment between compound **1j** and **1j-d<sub>4</sub>** by using both the substrates in 1:1 ratio. The chosen substrates were dissolved in a suitable solvent (1 mM) and added to a Tris buffer solution (0.1 M, pH 7.5) containing glucose (20 mM), NADPH (1.2 mM), glucose oxidase (10 U $\text{mg}^{-1}\text{mL}^{-1}$ ) and purified YqjM was added at 200 nM. The assay mixture was incubated for 8 h in an orbital shaker (100 rpm, 25°C), to give **2j/2j-d<sub>3</sub>** in 46% yield with ~36% deuterium incorporation.

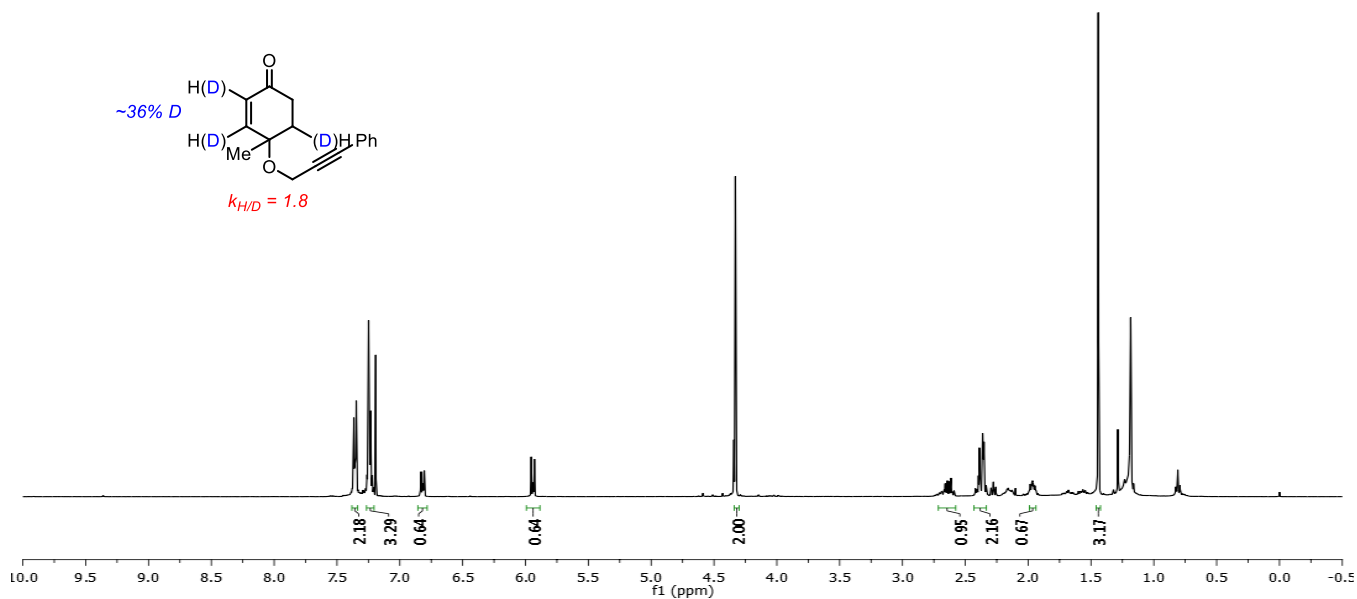

#### IVb. Labeling experiment on compound **1j**:

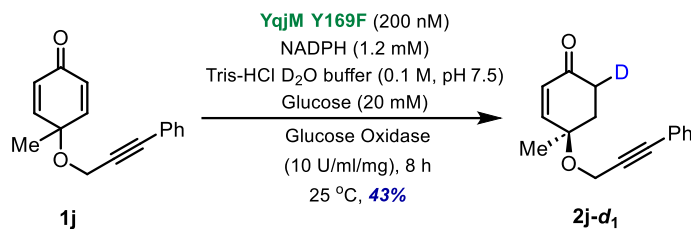

We carried out deuterium labeling experiment on compound **1j** in the presence YqjM Y169F mutant enzyme. The assay reaction was performed by dissolving the substrate in a suitable solvent (1 mM) and added to a Tris-D<sub>2</sub>O buffer (0.1 M, pH 7.5). To this, we added glucose (20 mM), NADPH (1.2 mM), glucose oxidase (10 U $\text{mg}^{-1}\text{mL}^{-1}$ ) and reaction was initiated after addition of purified Y169F at 200 nM. The reaction mix was incubated for 8 h in an orbital shaker (100 rpm, 25°C), to give **2j-d<sub>1</sub>** in 43% yield. <sup>1</sup>H NMR (400 MHz, CDCl<sub>3</sub>)  $\delta$  7.45 – 7.41 (m, 2H), 7.34 – 7.28 (m, 3H), 6.88 (dd,  $J = 10.3, 0.9$  Hz, 1H), 6.00 (dd,  $J = 10.2, 0.4$  Hz, 1H), 4.40 (s, 2H), 2.73 – 2.65 (m, 1H), 2.43 (dd,  $J = 13.3, 4.8$  Hz, 1H), 2.02 (ddd,  $J = 13.5, 6.8, 1.0$  Hz, 1H), 1.51 (s, 3H); <sup>13</sup>C NMR (101 MHz, CDCl<sub>3</sub>)  $\delta$  198.8, 153.1, 131.8, 130.1, 128.7, 128.4, 122.6, 86.1, 86.0, 74.3, 52.4, 34.6 (t,  $J_{\text{CD}} = 20.1$  Hz, 1D), 33.5, 24.5; HRMS (ESI)  $m/z$ : [M+H]<sup>+</sup> Calcd for C<sub>16</sub>H<sub>16</sub><sup>2</sup>HO<sub>2</sub> 242.1291; Found 242.1244.



## V. Steady-state kinetic parameters.

Activity was measured by the consumption of NADPH [ $Abs_{340\text{ nm}}$ ,  $\epsilon_{340\text{ nm}} = 6.2\text{ mM}^{-1}\text{ cm}^{-1}$ ] including an oxygen consuming system photometrically. Reaction condition included: 58  $\mu\text{L}$  Tris-HCl buffer (100 mM, pH 7.5); 10  $\mu\text{L}$  substrate in suitable solvent (1 mM); 10  $\mu\text{L}$  NADPH (1.2 mM); 2  $\mu\text{L}$  glucose (20 mM); 10  $\mu\text{L}$  glucose oxidase (10 U/mg/mL); 10  $\mu\text{L}$  YqjM WT (0.2  $\mu\text{M}$ ) to make final reaction volume of 100  $\mu\text{L}$  at 25°C. The change in absorption values at 340 nm was monitored for 30 min using a microtiter plate reader (TECAN infinite M200 PRO, Austria).<sup>1</sup>

Every measurement was performed in triplicate and corrected by a blank in the absence of substrate. The  $K_m$ ,  $V_{max}$  and  $k_{cat}$  values, were obtained from the non-linear regression of Michaelis–Menten plots (using GraphPad Prism 8.0 software). Error bars represent the standard deviations; data expressed as the mean  $\pm$  SEM.

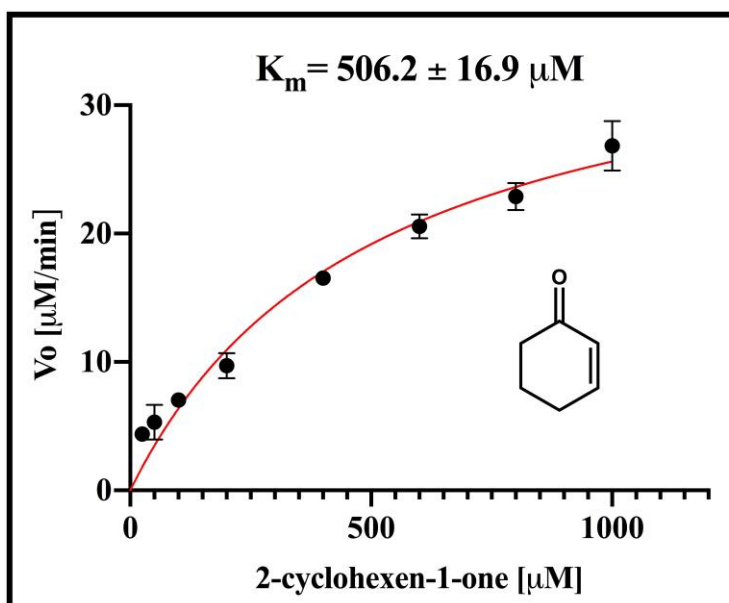

**Figure S2.** Michaelis-Menten plot for the reduction of 2-cyclohexen-1-one by YqjM (WT).

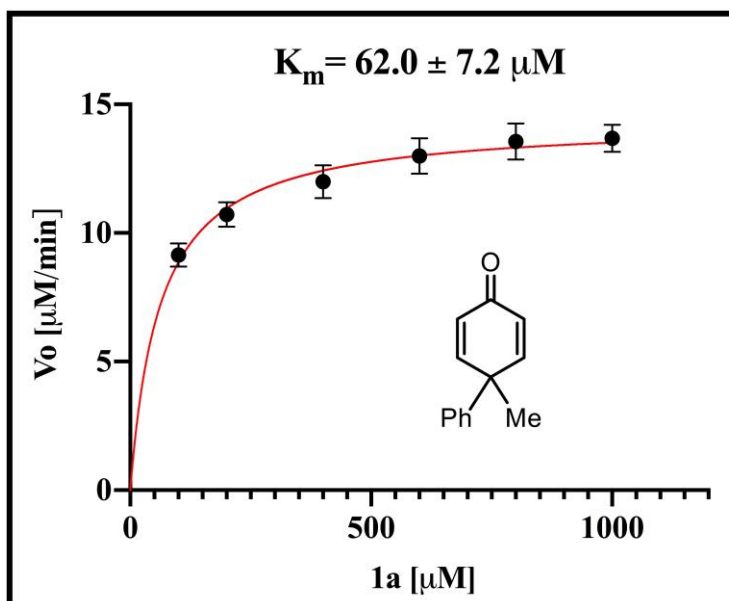

**Figure S3.** Michaelis-Menten plot for the reduction of **1a** by YqjM (WT).

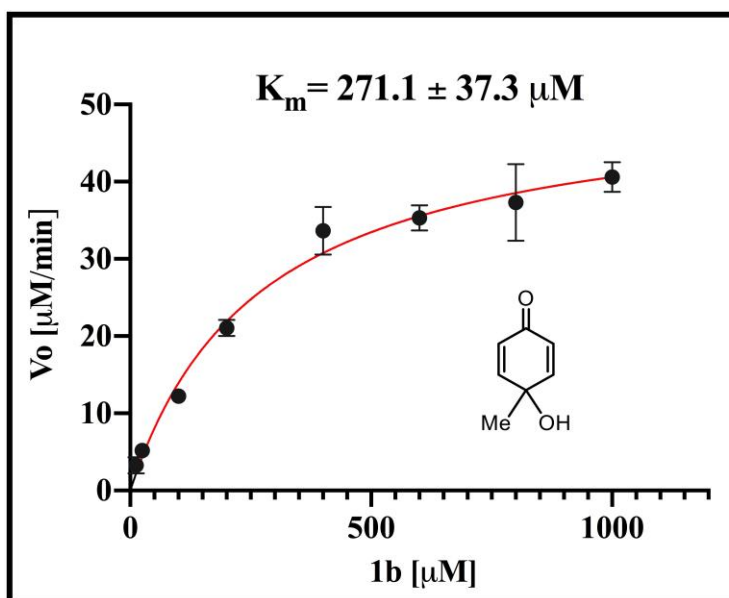

**Figure S4.** Michaelis-Menten plot for the reduction of **1b** by YqjM (WT).



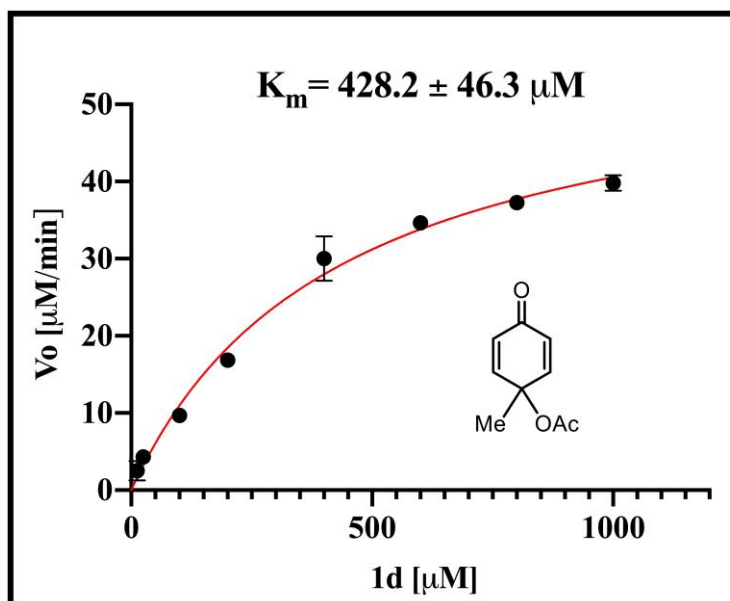

**Figure S5.** Michaelis-Menten plot for the reduction of **1d** by YqjM (WT).

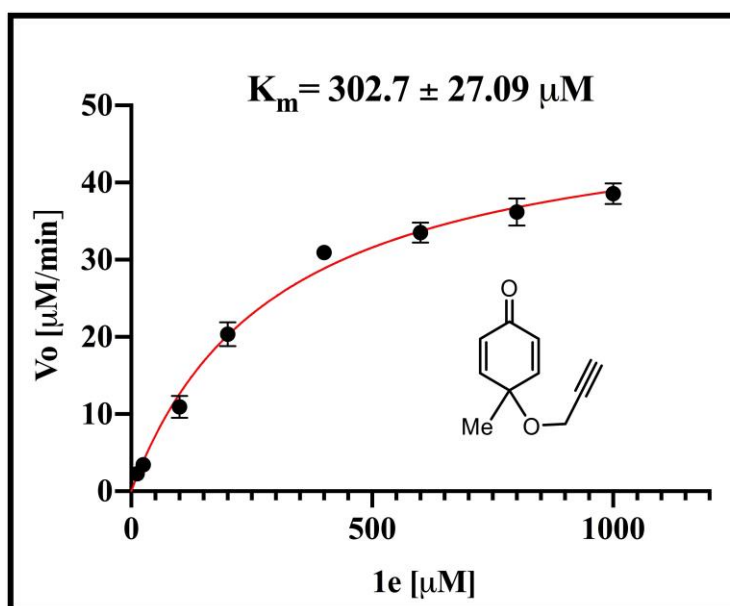

**Figure S6.** Michaelis-Menten plot for the reduction of **1e** by YqjM (WT).

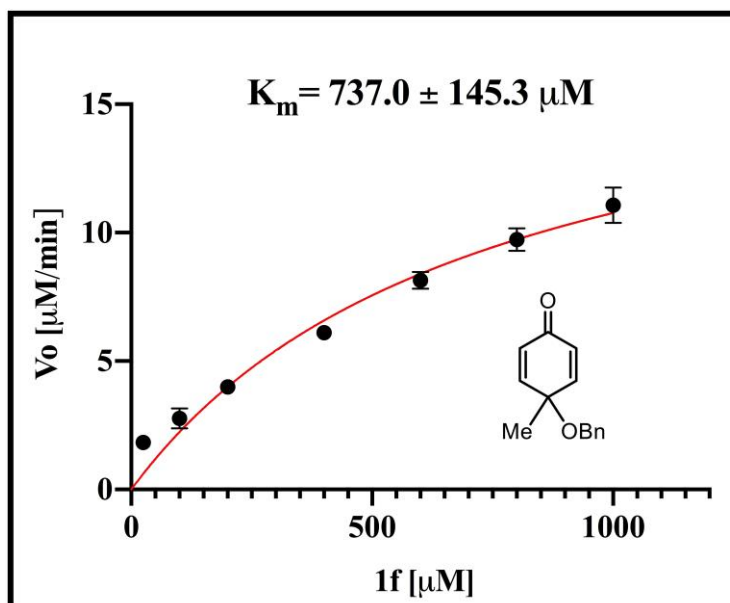

**Figure S7.** Michaelis-Menten plot for the reduction of **1f** by YqjM (WT).

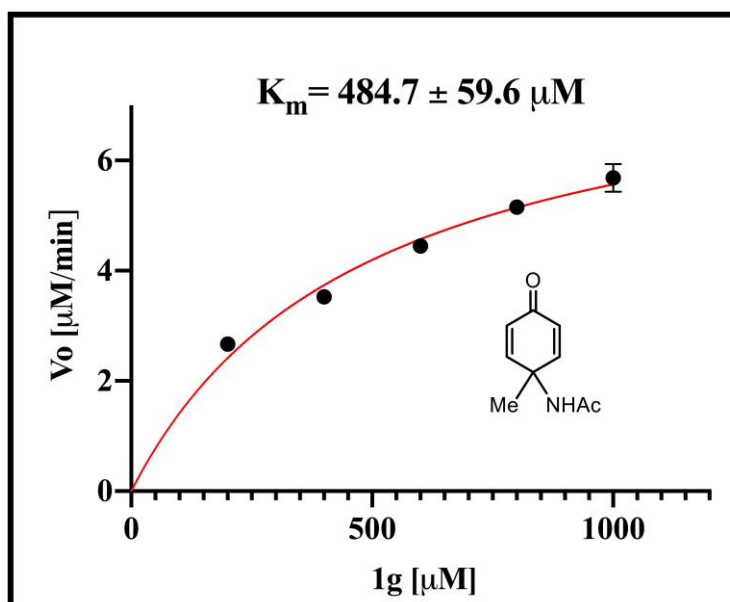

**Figure S8.** Michaelis-Menten plot for the reduction of **1g** by YqjM (WT).

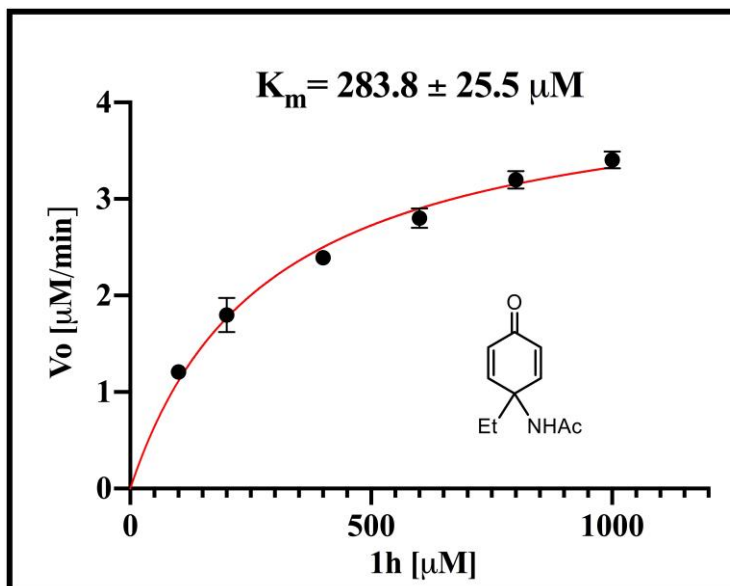

**Figure S9.** Michaelis-Menten plot for the reduction of **1h** by YqjM (WT).

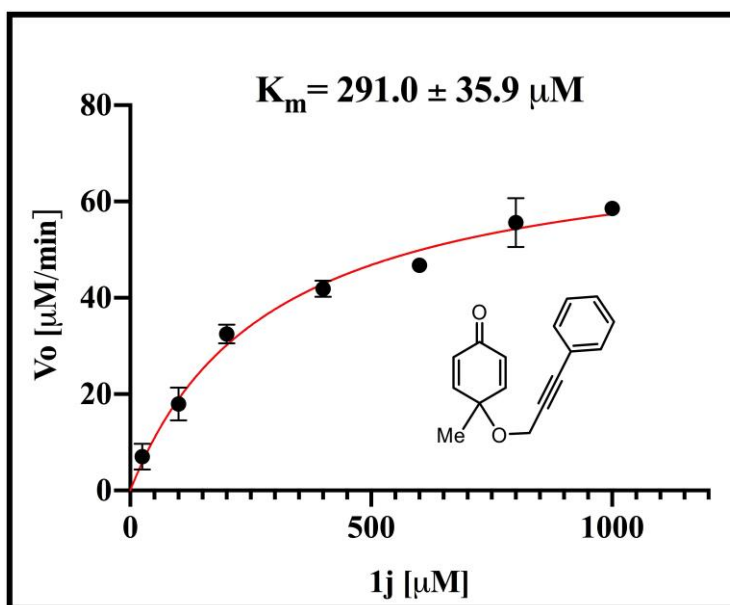

**Figure S10.** Michaelis-Menten plot for the reduction of **1j** by YqjM (WT).

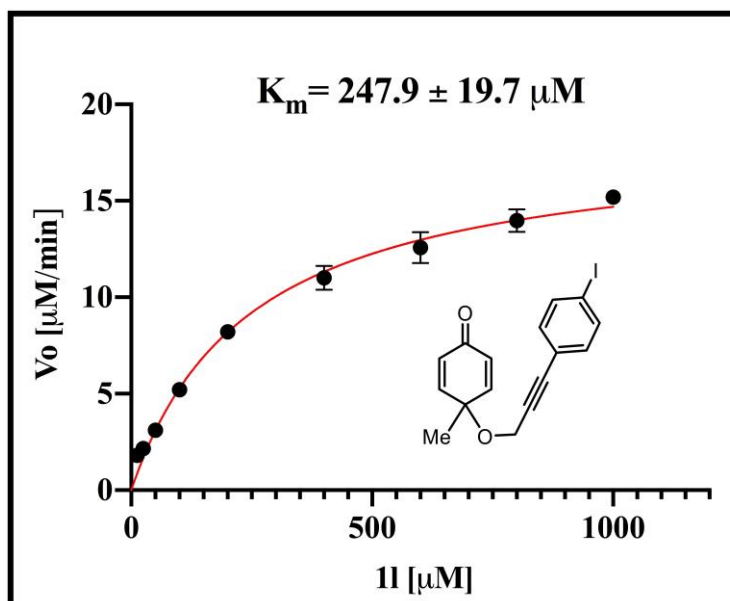

**Figure S11.** Michaelis-Menten plot for the reduction of **1l** by YqjM (WT).

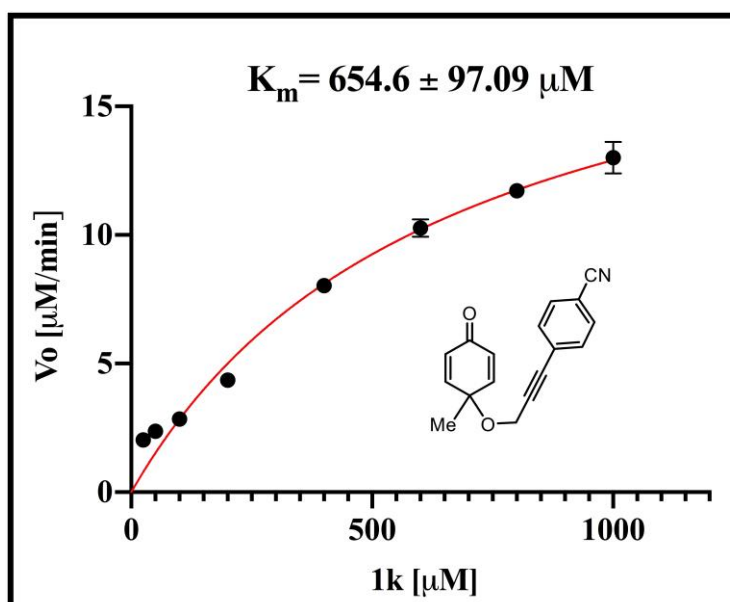

**Figure S12.** Michaelis-Menten plot for the reduction of **1k** by YqjM (WT).

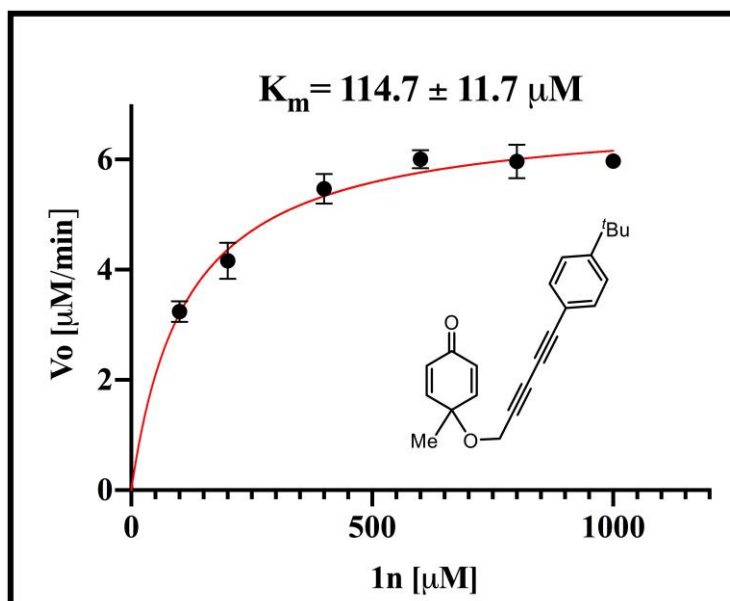

**Figure S13.** Michaelis-Menten plot for the reduction of **1n** by YqjM (WT)

## VI. Bio-reduction of $\alpha$ , $\beta$ -unsaturated substrates

The chosen substrate dissolved in a suitable solvent (1 mM) was added to a Tris buffer solution (0.1 M, pH 7.5) containing glucose (20 mM), NADPH (1.2 mM), glucose oxidase (10U mg<sup>-1</sup>mL<sup>-1</sup>) and finally purified YqjM was added (200 nM). The reaction mixture was incubated for 12 h in an orbital shaker (100 rpm, 25°C). The solution was extracted with EtOAc and the combined organic solutions were dried over anhydrous Na<sub>2</sub>SO<sub>4</sub> for further analysis.<sup>2</sup>

## VII. NADPH recycling by GDH coupled assay

For the reduction of substrates, the following conditions were used- the reaction mixture contained substrate (1 mM), NADP<sup>+</sup> (0.1 mM), glucose (20 mM), glucose dehydrogenase (0.5 U/mL/mg) in a Tris buffer (0.1 M, pH 8.0). Finally purified enzyme was added to a final concentration of 200nM and incubated for 12 h at 30°C in an orbital shaker at 100 rpm. Adding EtOAc terminated the solution and product was purified for further analysis.<sup>14</sup>

## VIII. YqjM Site Directed Mutagenesis

Primers used for mutagenesis:

| <b>List</b> | <b>Mutants</b>         | <b>Primers</b>                                                                            |
|-------------|------------------------|-------------------------------------------------------------------------------------------|
| 1           | C26A- FP<br>C26A- RP   | TCGCCAATGGCGATGTATTCTT<br>AAGAATACATCGCCATTGGCG                                           |
| 2           | C26S- FP<br>C26S- RP   | TCGCCAATGAGCATGTATTCTT<br>AAGAATACATGCTCATTGGCG                                           |
| 3           | I69A- FP<br>I69A- RP   | GACGAGCGACTGACCAAGACTTAGGCATTTGGAGCGACGAG<br>CTAAGTCTTGGTCAGTCGCTCGTCCTTGAGGGTTAACCGCTGA  |
| 4           | R336A- FP<br>R336A- RP | GCCCCTGTTCAATACGAAGCGGGCTGGTAA<br>CGCTTCGTATTGAACAGGGGCCGGAATCTCTG                        |
| 5           | Y28A- FP<br>Y28A- RP   | CATGGCGTCTTCTCATGAAAAGGACGGAAAATTAACACCGTTC<br>CTTTTCATGAGAAGACGCCATGCACATTGGCGACATGACAAT |
| 6           | Y28F- FP<br>Y28F- RP   | ATGTGCATGTTTTCTTCTCATG<br>CATGAGAAGAAAACATGCACAT                                          |
| 7           | Y169F- FP<br>Y169F- RP | GCGCACGGATTTTTAATTCAT<br>ATGAATTAAAAATCCGTGCGC                                            |

## IX. Stereochemical outcomes of YqjM mutants

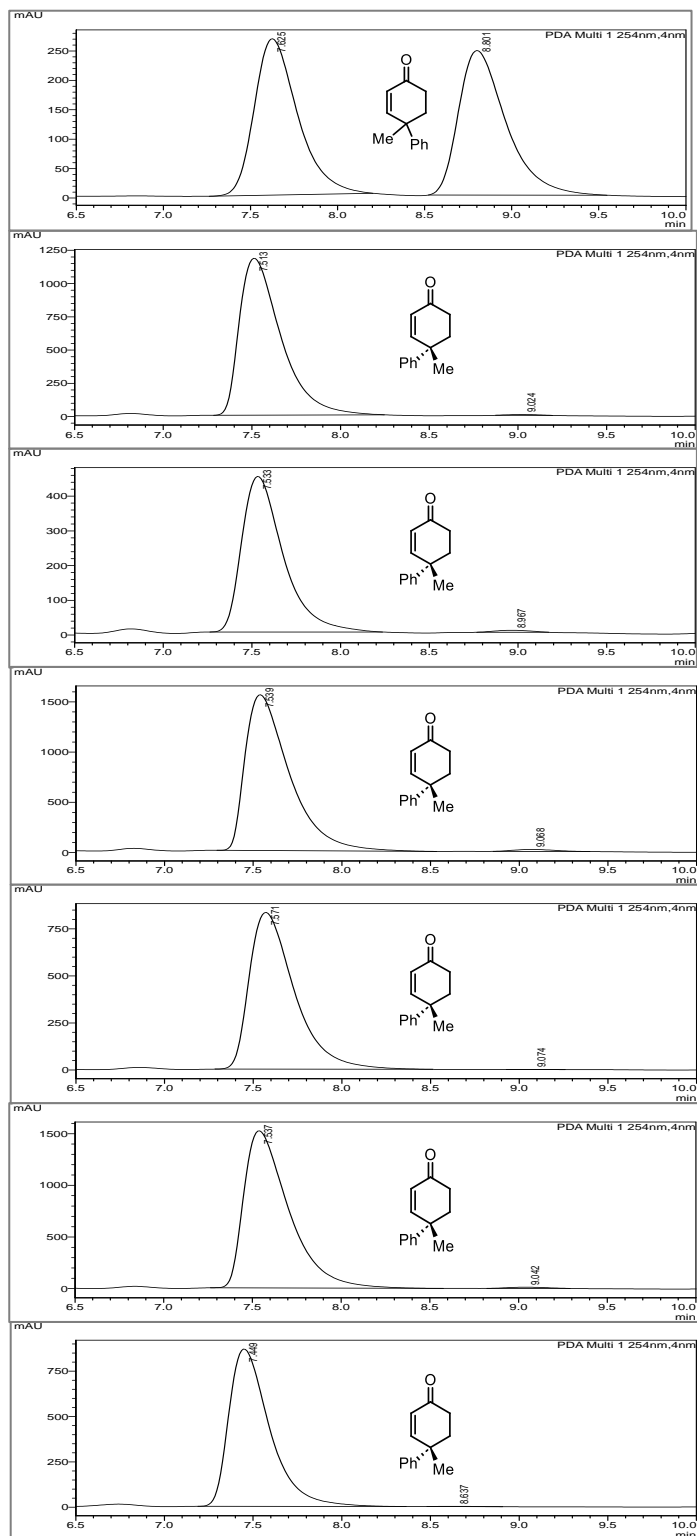

### RACEMIC

#### <Peak Table>

| PDA Ch1 254nm Peak# | Ret. Time | Area    | Height | Area%   | Height% |
|---------------------|-----------|---------|--------|---------|---------|
| 1                   | 7.625     | 4617381 | 265756 | 49.727  | 51.957  |
| 2                   | 8.801     | 4668016 | 245740 | 50.273  | 48.043  |
| Total               |           | 9285397 | 511496 | 100.000 | 100.000 |

### YqjM WT

#### <Peak Table>

| PDA Ch1 254nm Peak# | Ret. Time | Area     | Height  | Area%   | Height% |
|---------------------|-----------|----------|---------|---------|---------|
| 1                   | 7.513     | 19238123 | 1179313 | 99.637  | 99.493  |
| 2                   | 9.024     | 70073    | 6011    | 0.363   | 0.507   |
| Total               |           | 19308196 | 1185324 | 100.000 | 100.000 |

### YqjM C26A

#### <Peak Table>

| PDA Ch1 254nm Peak# | Ret. Time | Area    | Height | Area%   | Height% |
|---------------------|-----------|---------|--------|---------|---------|
| 1                   | 7.533     | 7324269 | 448041 | 98.943  | 98.756  |
| 2                   | 8.967     | 78252   | 5646   | 1.057   | 1.244   |
| Total               |           | 7402521 | 453686 | 100.000 | 100.000 |

### YqjM C26S

#### <Peak Table>

| PDA Ch1 254nm Peak# | Ret. Time | Area     | Height  | Area%   | Height% |
|---------------------|-----------|----------|---------|---------|---------|
| 1                   | 7.539     | 26999010 | 1550146 | 98.869  | 98.760  |
| 2                   | 9.068     | 308797   | 19469   | 1.131   | 1.240   |
| Total               |           | 27307807 | 1569615 | 100.000 | 100.000 |

### YqjM R336A

#### <Peak Table>

| PDA Ch1 254nm Peak# | Ret. Time | Area     | Height | Area%   | Height% |
|---------------------|-----------|----------|--------|---------|---------|
| 1                   | 7.571     | 14760136 | 832762 | 99.952  | 99.924  |
| 2                   | 9.074     | 7027     | 629    | 0.048   | 0.076   |
| Total               |           | 14767163 | 833391 | 100.000 | 100.000 |

### YqjM Y28A

#### <Peak Table>

| PDA Ch1 254nm Peak# | Ret. Time | Area     | Height  | Area%   | Height% |
|---------------------|-----------|----------|---------|---------|---------|
| 1                   | 7.537     | 26847818 | 1520433 | 99.331  | 99.216  |
| 2                   | 9.042     | 180711   | 12010   | 0.669   | 0.784   |
| Total               |           | 27028529 | 1532443 | 100.000 | 100.000 |

### YqjM Y28F

#### <Peak Table>

| PDA Ch1 254nm Peak# | Ret. Time | Area     | Height | Area%   | Height% |
|---------------------|-----------|----------|--------|---------|---------|
| 1                   | 7.449     | 13915648 | 867000 | 99.877  | 99.872  |
| 2                   | 8.637     | 17092    | 1112   | 0.123   | 0.128   |
| Total               |           | 13932741 | 868113 | 100.000 | 100.000 |

Fig S14. Chiral traces of mutagenesis

## X. References

- (1) M. Pesic, E. Fernández-Fueyo, F. Hollmann, *ChemistrySelect*, 2017, **2**, 3866-3871.
- (2) K. Kitzing, T. B. Fitzpatrick, C. Wilken, J. Sawa, G. P. Bourenkov, P. Macheroux, T. Clausen, *J Biol Chem.*, 2005, **280**, 27904-27913.
- (3) J. K. Hexum, R. Tello-Aburto, N. B. Struntz, A. M. Harned, D. A. Harki, *ACS Med. Chem. Lett.*, 2012, **3**, 459-464.
- (4) K. Juliane, L. Mark, *Org. Lett.* 2013, **15**, 1148–1151.
- (5) Y. Fukui, P. Liu, Q. Liu, Z.T. He, N.Y. Wu, P. Tian, G.Q. Lin, *J. Am. Chem. Soc.*, 2014, **136**, 15607-15614.
- (6) Z. T. He, X. Q. Tang, L. B. Xie, M. Cheng, P. Tian, G. Q. Lin, *Angew. Chem., Int. Ed.*, 2015, **54**, 14815-14818.
- (7) C. Christopher, L. H. Wai, *J. Am. Chem. Soc.*, 2016, **138**, 8068–8071.
- (8) K. Balaraman, V. Kesavan, *Synthesis*, 2010, 3461-3466, DOI: 10.1055/s-0030-1258199
- (9) Y. Naganawa, M. Kawagishi, J. I. Ito, H. Nishiyama, *Angew. Chem.*, 2016, **128**, 6987-6990.
- (10) A. Presser, G. Lainer, N. Kretschmer, W. Schuehly, R. Saf, M. Kaiser, M.M. Kalt, *Molecules*, 2018, **23**, 2902.
- (11) K. Matsunaga, N. Saito, H.;Kogen, K. Takatori, *Org. Lett.*, 2019, **21**, 6054-6057.
- (12) A. Victoria, *Chem. Sci.*, 2020, **11**, 7444-7450.
- (13) H. Liang, M.A. Ciufolini, *J. Org. Chem.*, **2008**, *73*, 4299–4301.
- (14) E. R uthlein, T. Classen, L. Dobnikar, M. Sch lzel, J. Pietruszka, *Adv. Synth. Catal.*, 2015, **357**, 1775-1786.





### 4-Hydroxy-4-methylcyclohex-2-en-1-one (2b):

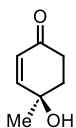

<sup>1</sup>H NMR (400 MHz, CDCl<sub>3</sub>)

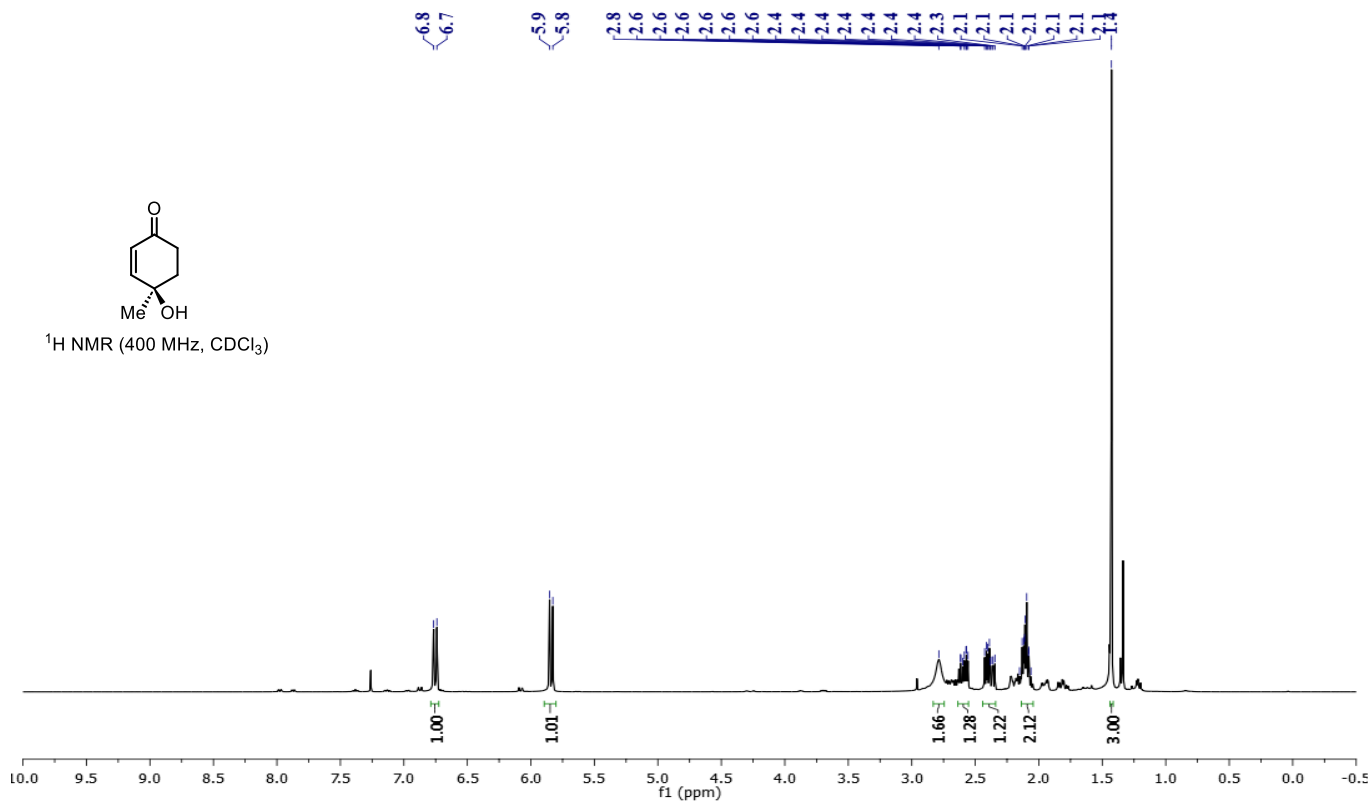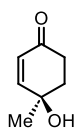

<sup>13</sup>C NMR (126 MHz, CDCl<sub>3</sub>)

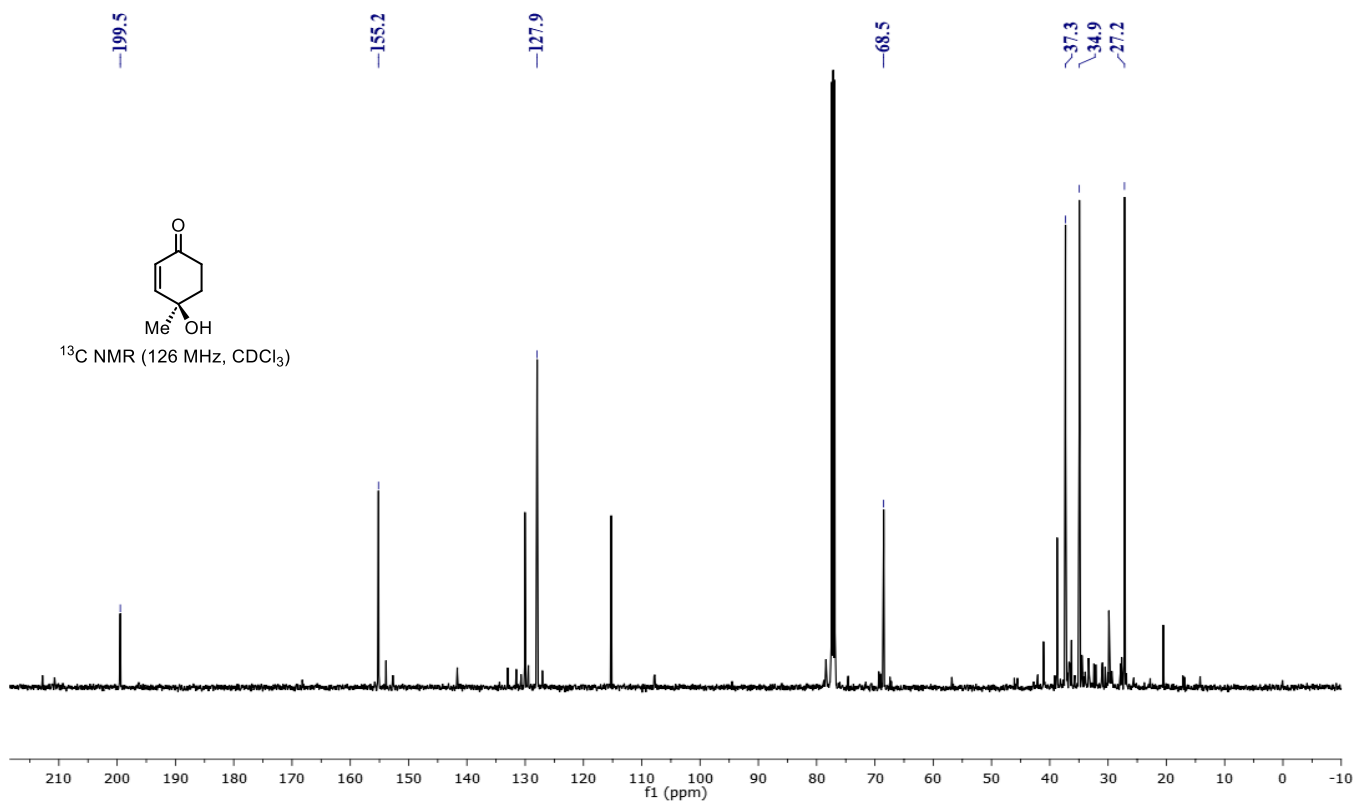

# 1-Methyl-4-oxocyclohex-2-en-1-yl acetate (2d):

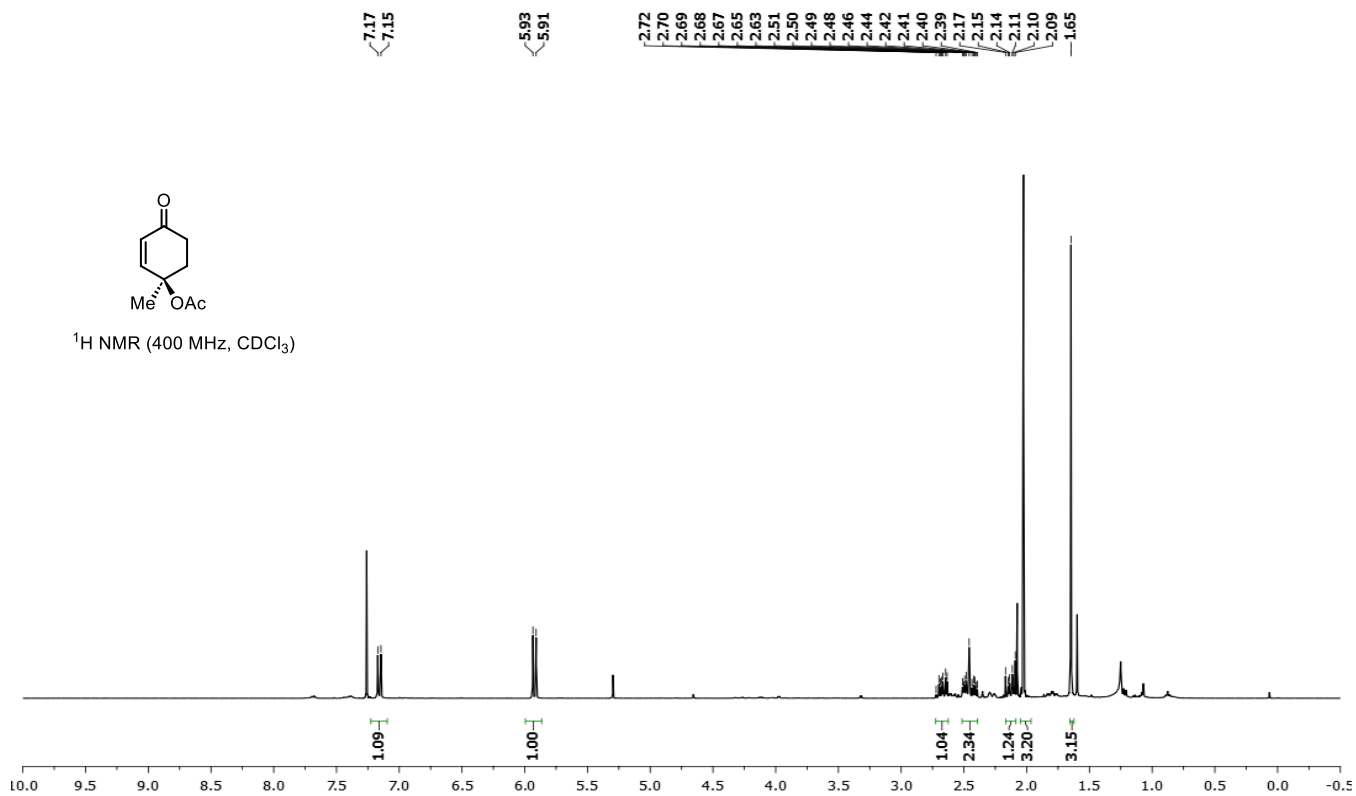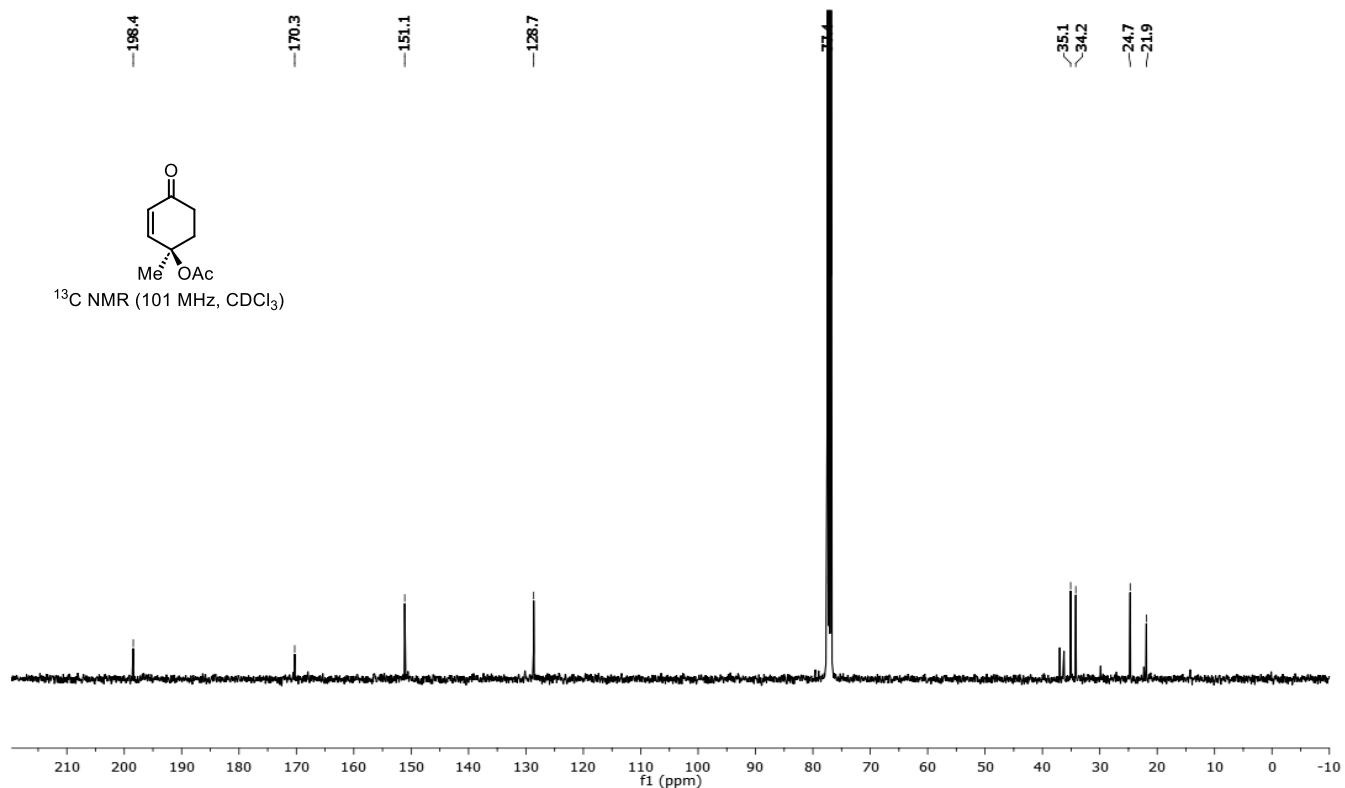

### 4-Methyl-4-(prop-2-yn-1-yloxy)cyclohex-2-en-1-one (2e):

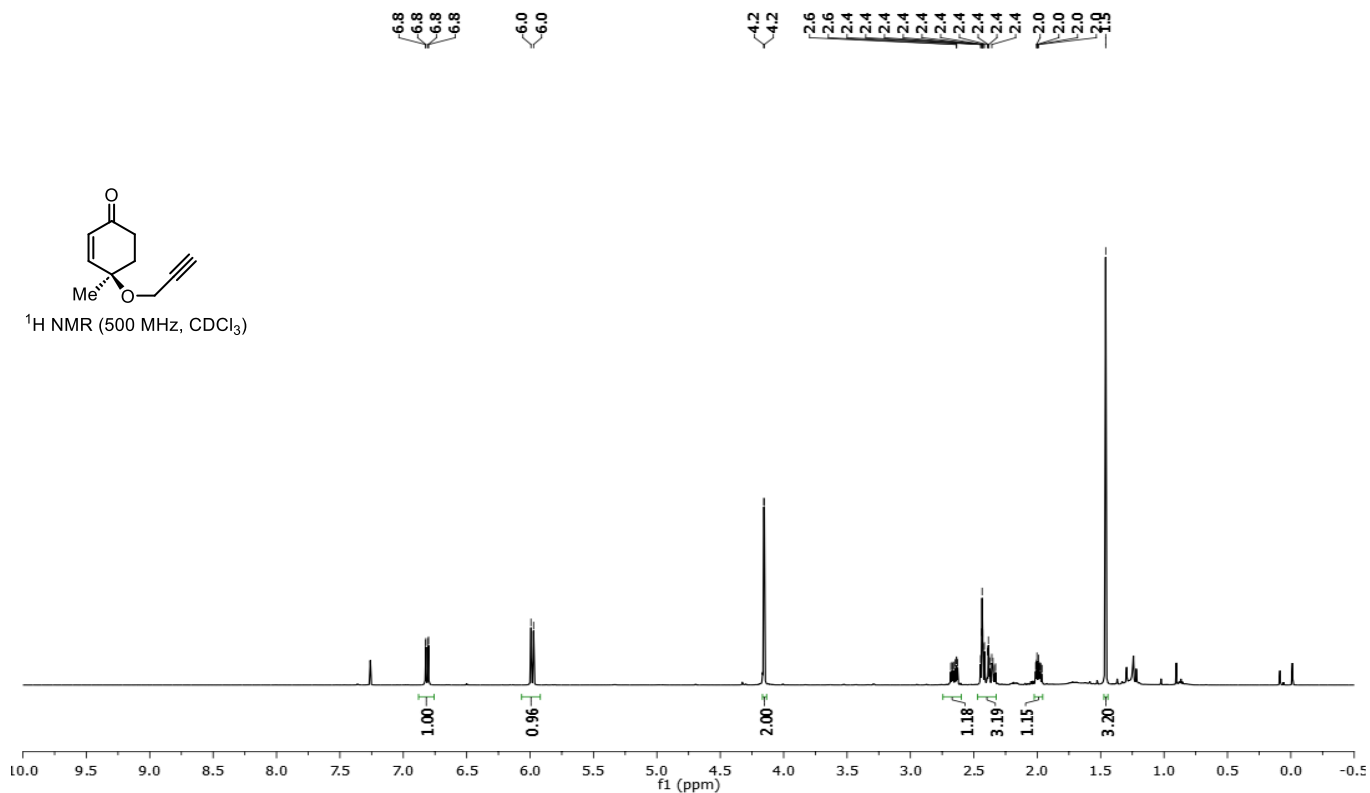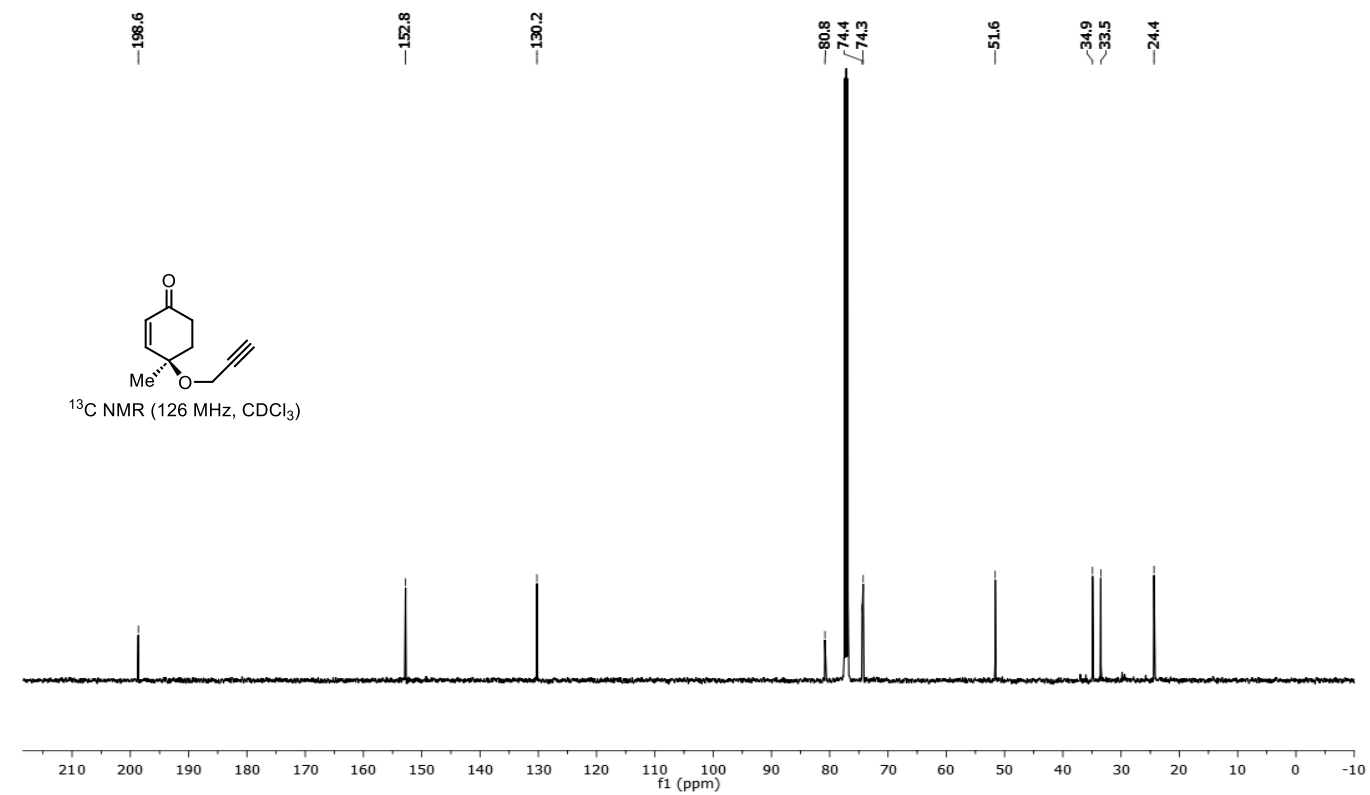

### 4-(Benzyloxy)-4-methylcyclohex-2-en-1-one (2f):

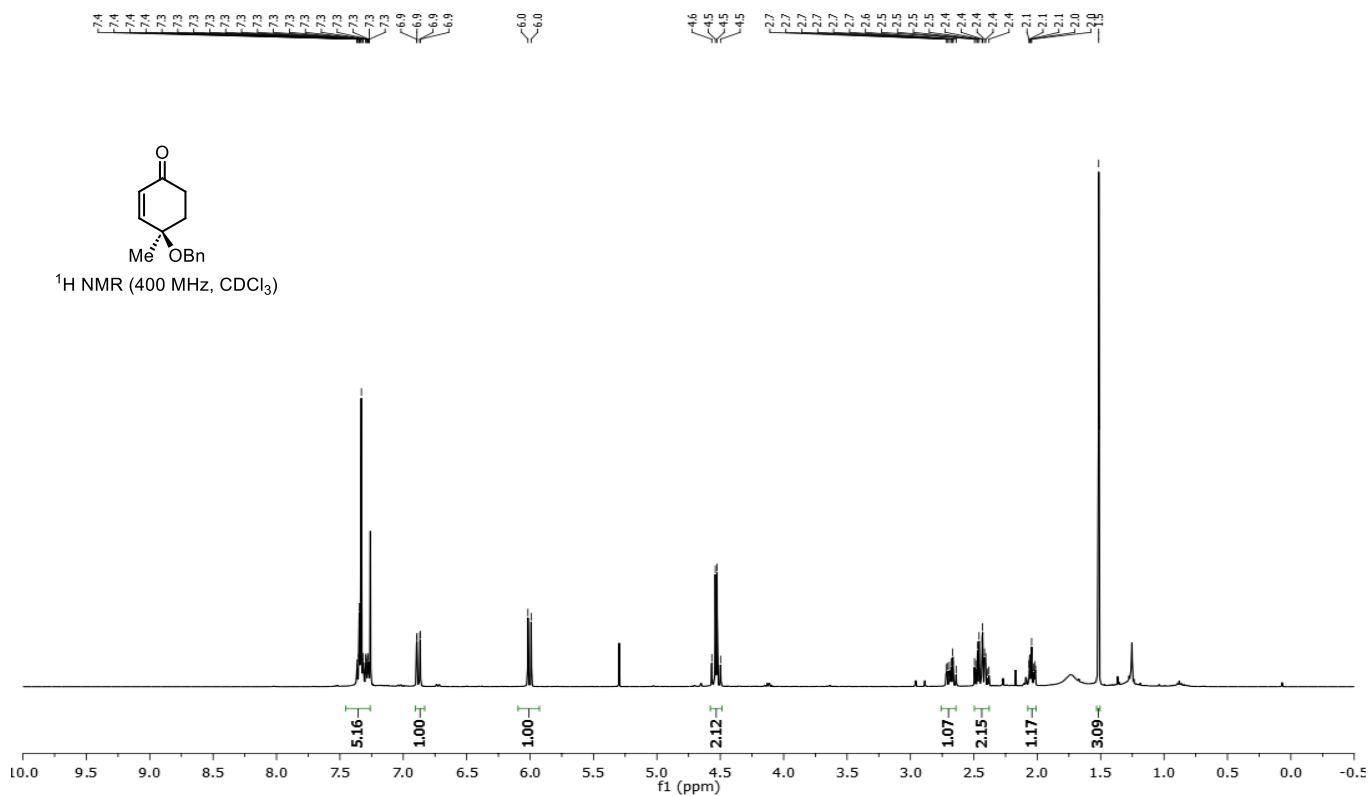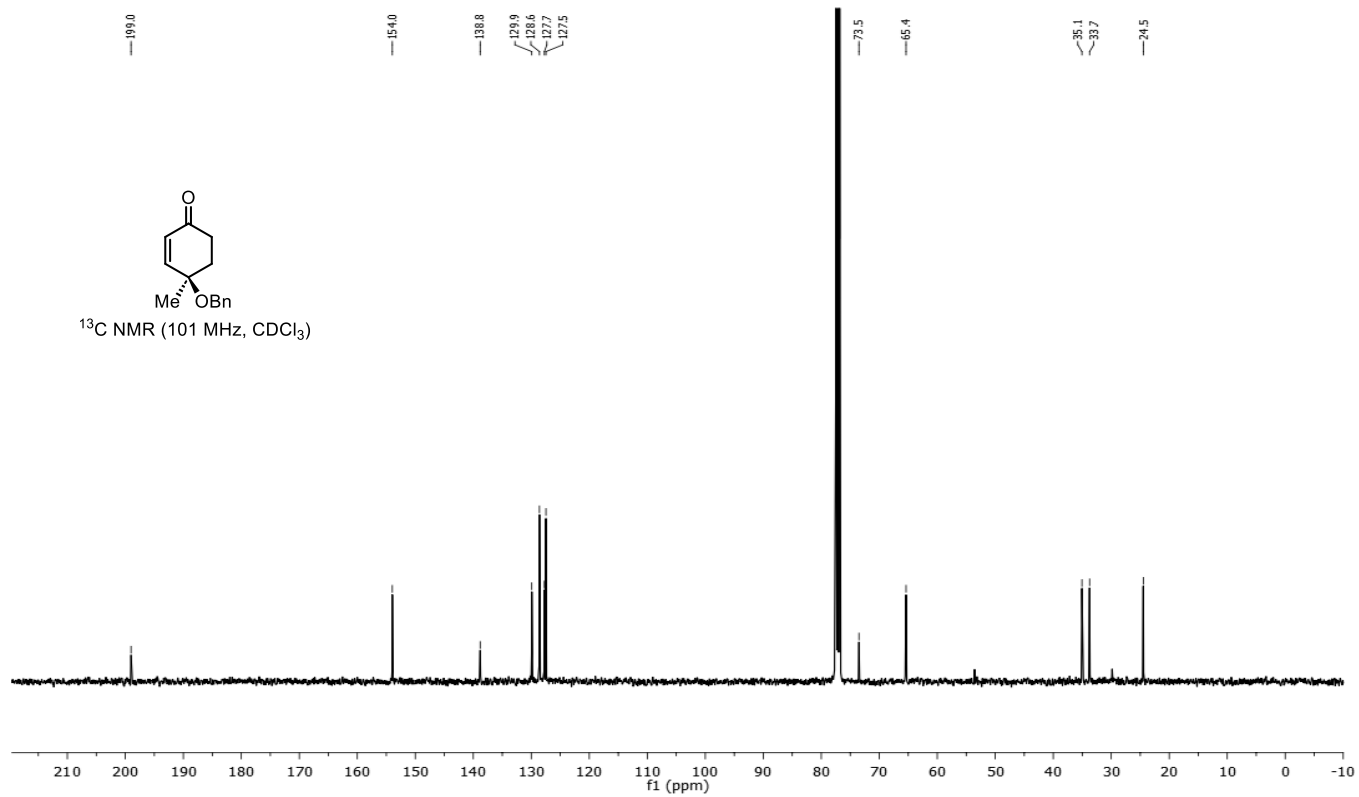

# N-(1-Methyl-4-oxocyclohex-2-en-1-yl)acetamide (2g):

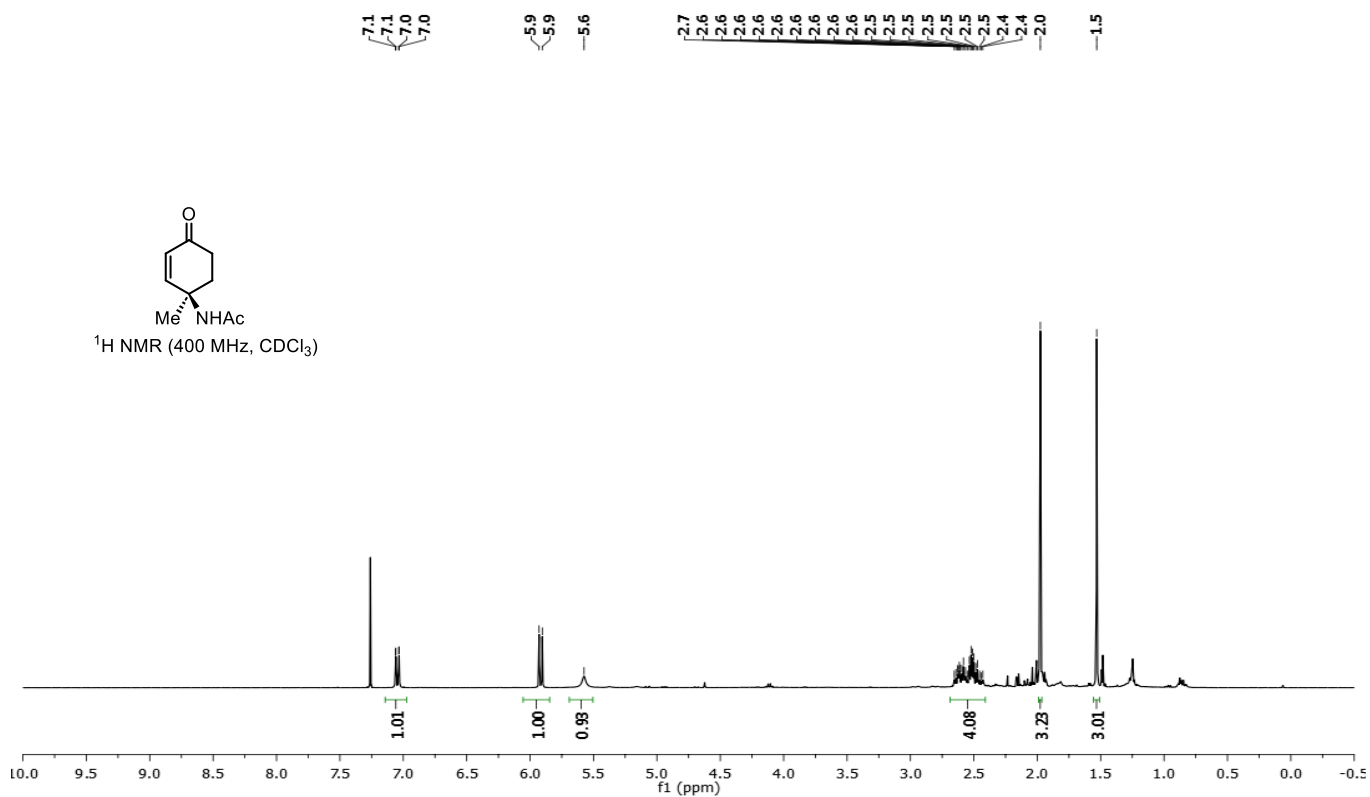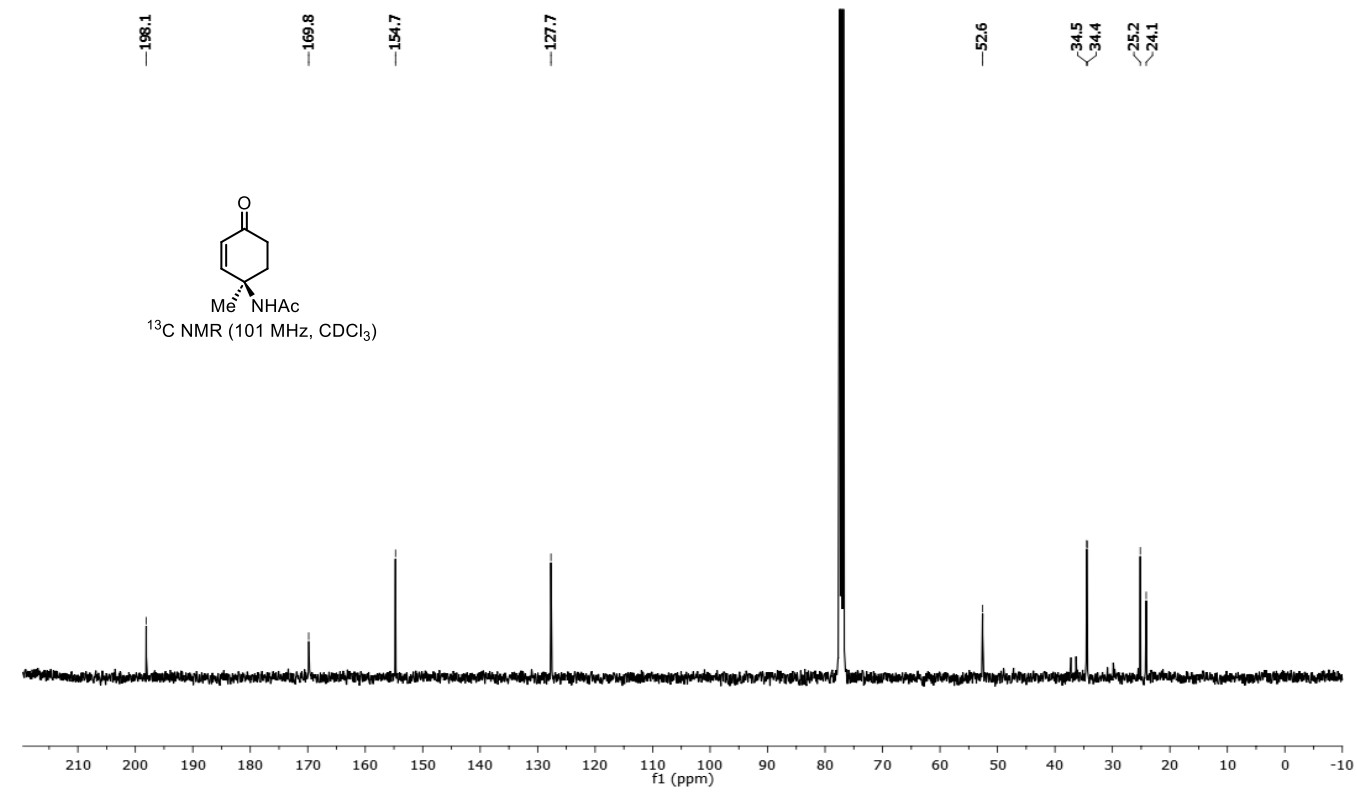

**N-(1-Ethyl-4-oxocyclohex-2-en-1-yl)acetamide (2h):**

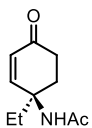

<sup>1</sup>H NMR (400 MHz, CDCl<sub>3</sub>)

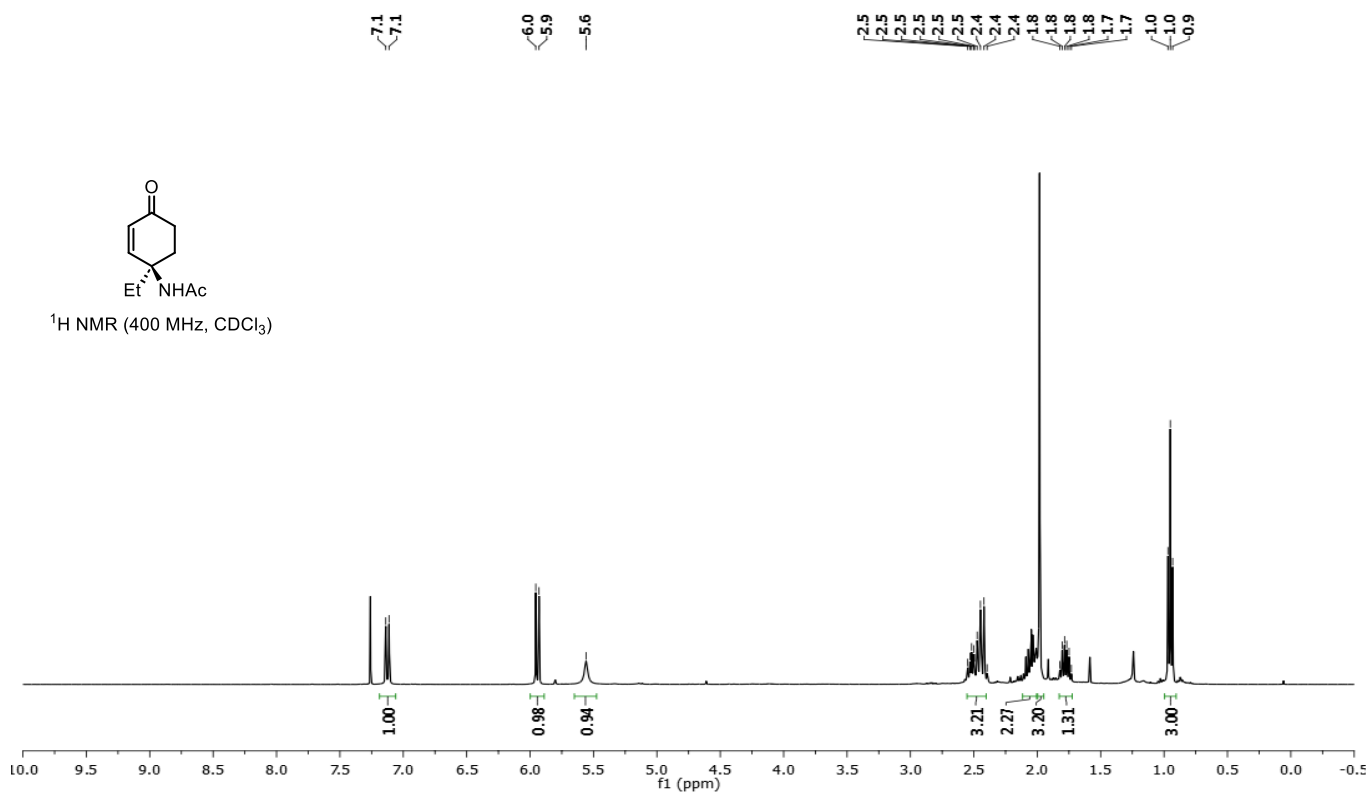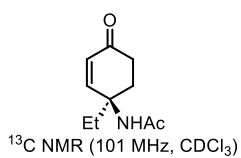

<sup>13</sup>C NMR (101 MHz, CDCl<sub>3</sub>)

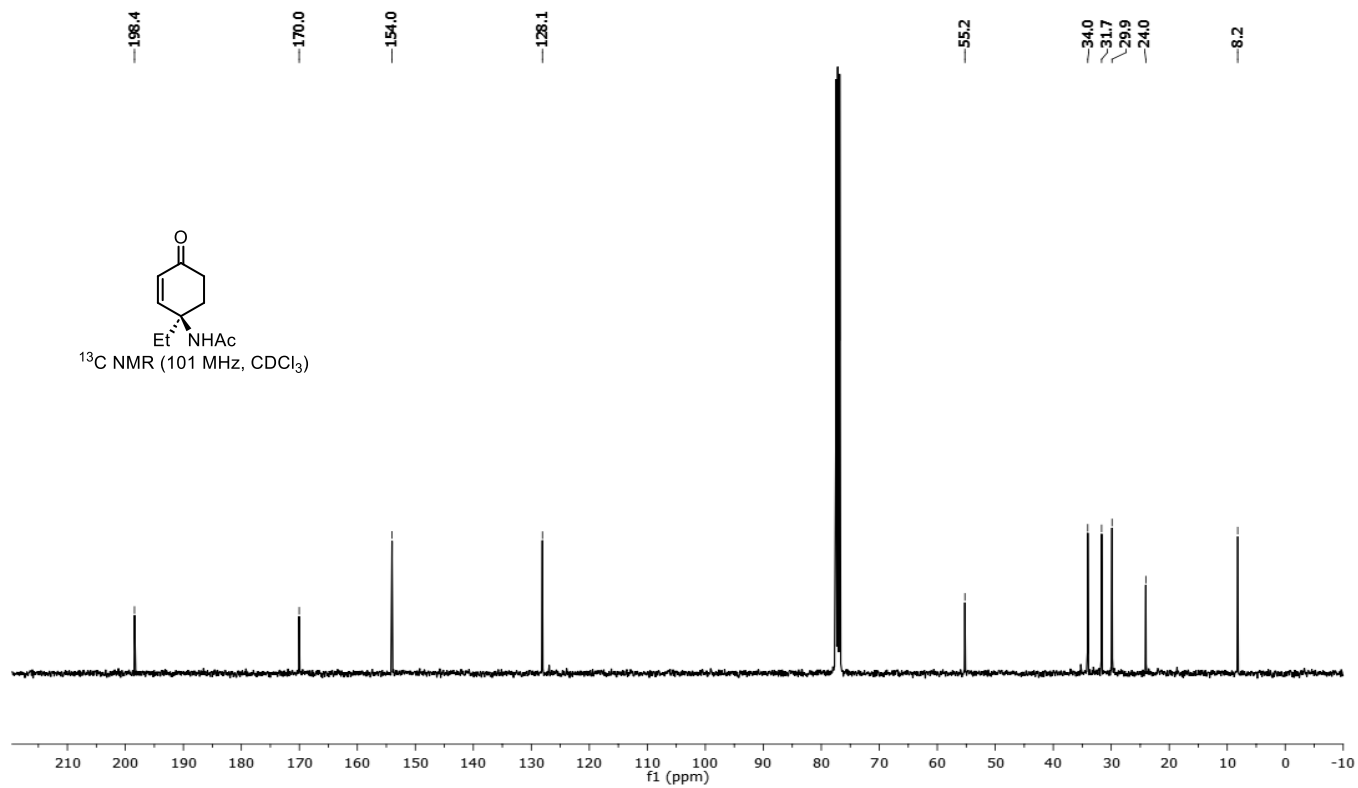

### 4-Methyl-4-((3-phenylprop-2-yn-1-yl)oxy)cyclohex-2-en-1-one (2j):

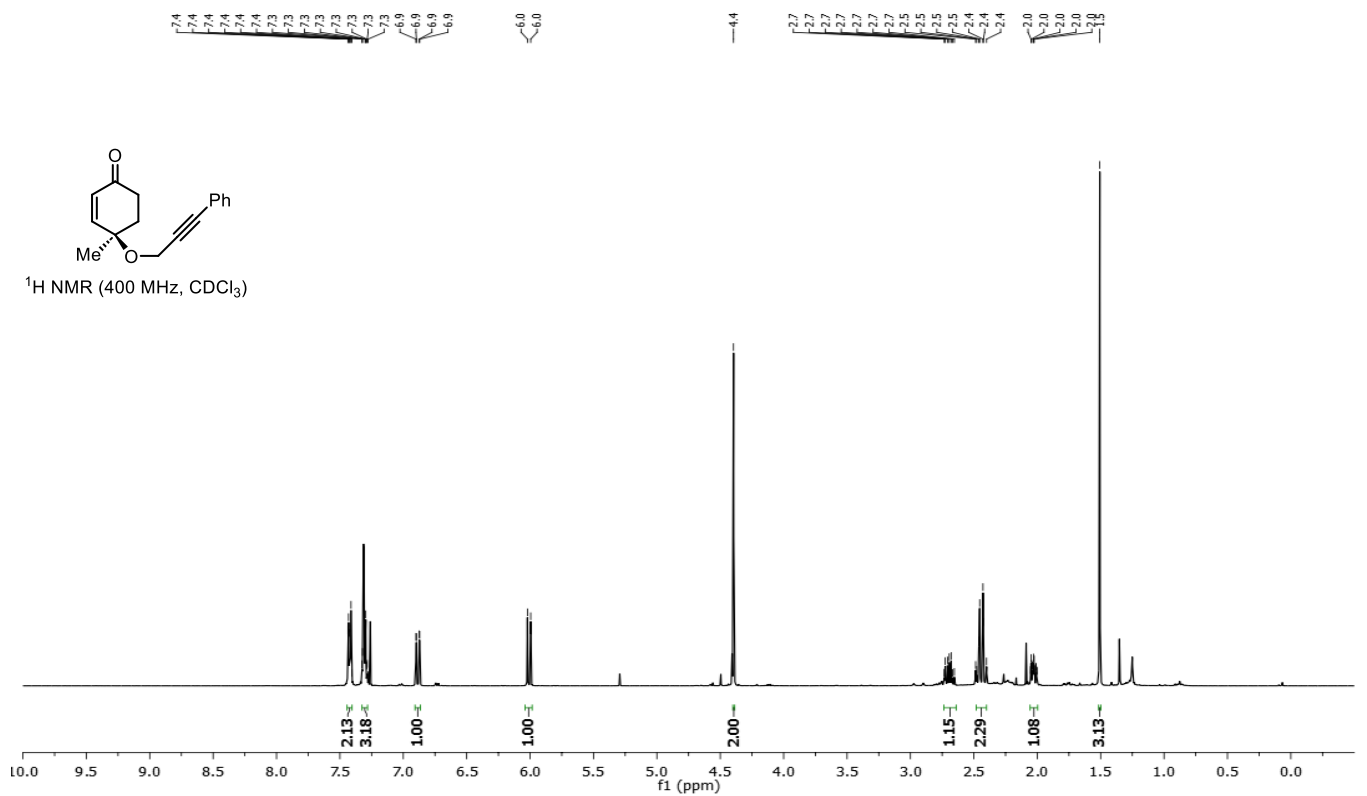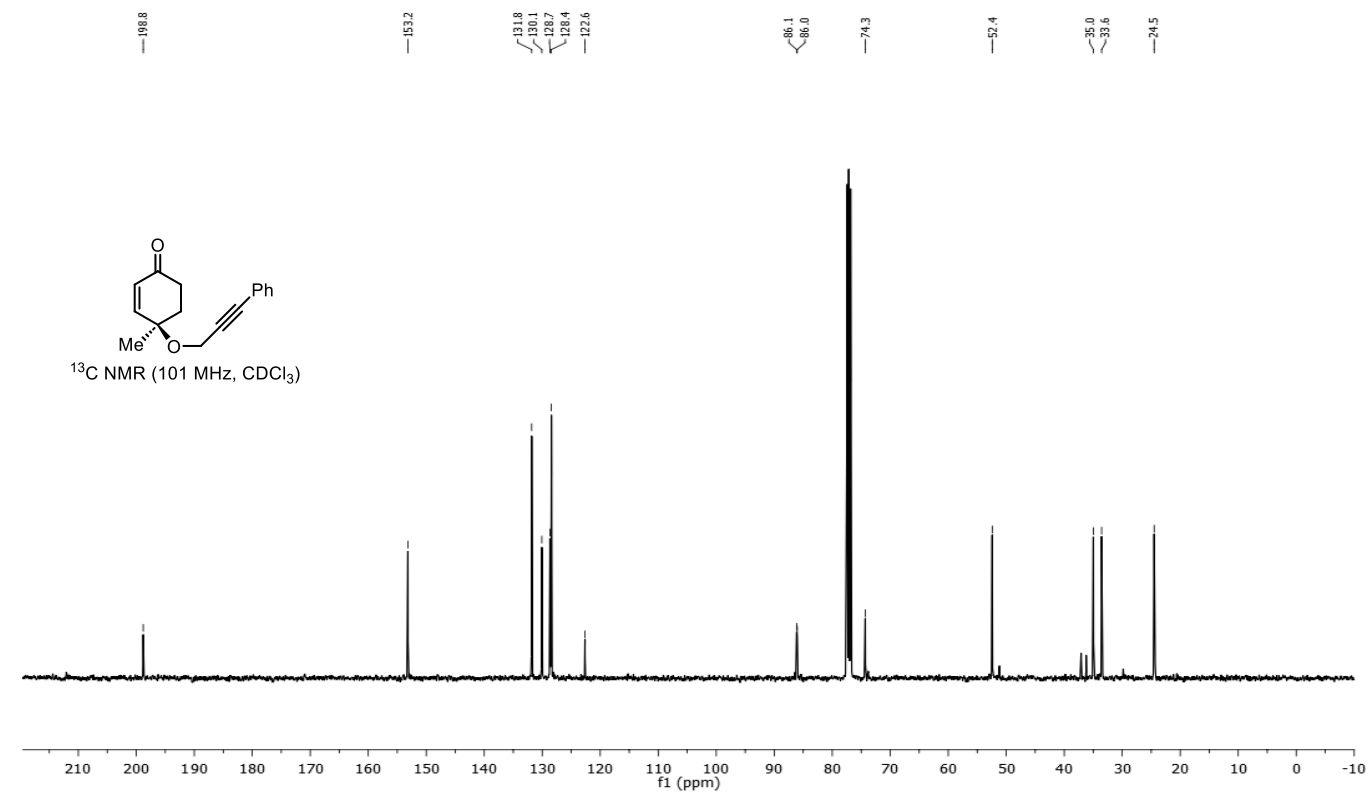



**4-((5-(4-(Tert-butyl)phenyl)penta-2,4-diy-1-yl)oxy)-4-methylcyclohex-2-en-1-one (2n):**

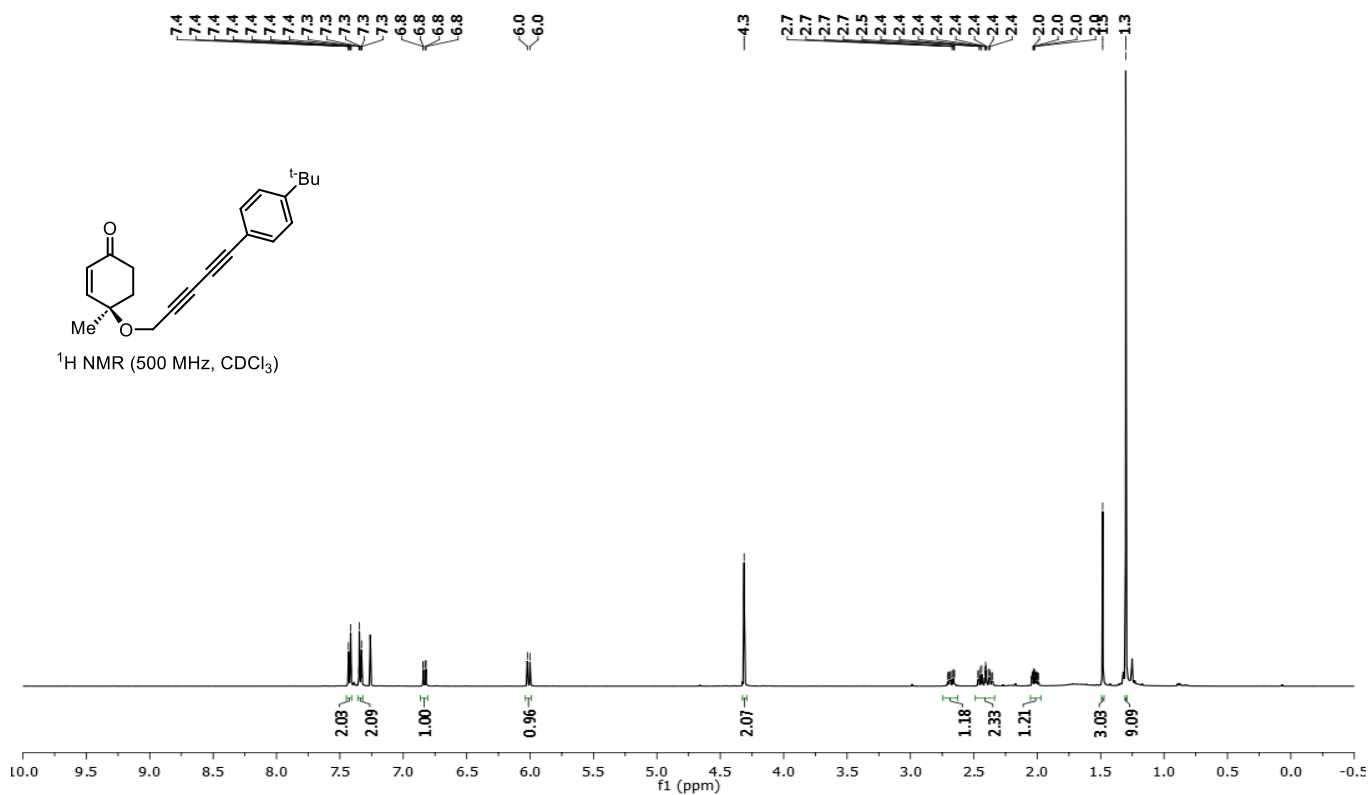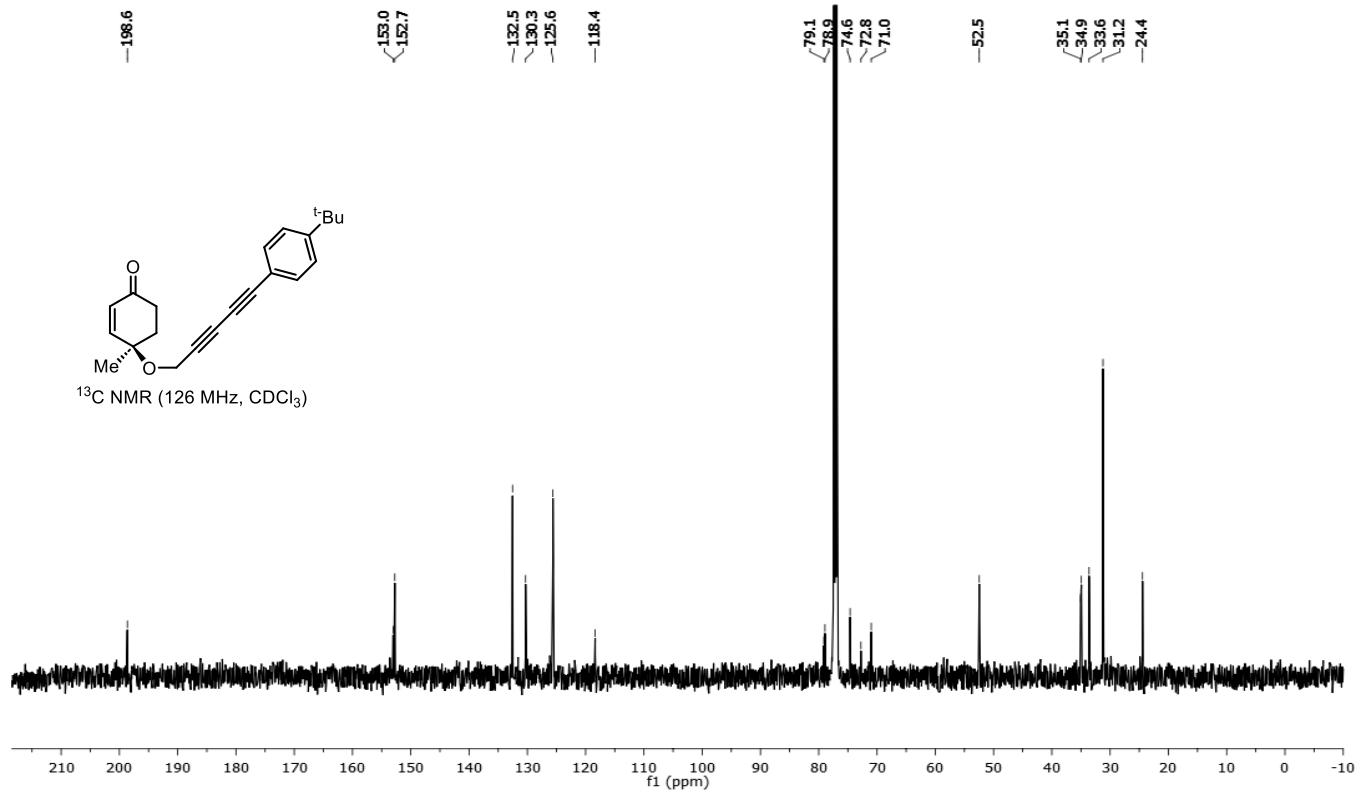

Supplement: d4cc02181a1.pdf [file d4cc02181a1.pdf]
